# Supplementary material for: KAT6A amplifications are associated with shorter progression-free survival and overall survival in patients with endometrial serous carcinoma
Source: PLoS One. 2020 Sep 2;15(9):e0238477. doi: 10.1371/journal.pone.0238477 (PMC7467277; doi:10.1371/journal.pone.0238477)
Supplement: S4 Table — (XLSX) [file pone.0238477.s004.xlsx]

## Sheet: Supplematary Table  4
Supplementary Table 4
Gene A	Locus Gene A	Gene B	Locus Gene B	Log2 Odds Ratio	p-Value	q-Value	Tendency
MYCL	1p34.3-p34.2	KAT6B	10q22.2-q22.3	-0.355	0.648	0.656	Mutual exclusivity		Co-amplified in the same loci
MYCL	1p34.3-p34.2	CDK12	17q12-q21.1	-0.355	0.648	0.656	Mutual exclusivity		Co-amplified in the different loci
MYCL	1p34.3-p34.2	ERBB2	17q12-q21.1	-0.036	0.669	0.673	Mutual exclusivity
MYCL	1p34.3-p34.2	BRD4	19p13.2-p13.11	1.036	0.268	0.515	Co-occurrence
MYCL	1p34.3-p34.2	CALR	19p13.2-p13.11	1.552	0.152	0.429	Co-occurrence
MYCL	1p34.3-p34.2	DNAJB1	19p13.2-p13.11	1.552	0.152	0.429	Co-occurrence
MYCL	1p34.3-p34.2	DNM2	19p13.2-p13.11	0.065	0.614	0.65	Co-occurrence
MYCL	1p34.3-p34.2	JAK3	19p13.2-p13.11	0.797	0.393	0.58	Co-occurrence
MYCL	1p34.3-p34.2	KEAP1	19p13.2-p13.11	-0.871	0.49	0.625	Mutual exclusivity
MYCL	1p34.3-p34.2	LYL1	19p13.2-p13.11	2.017	0.056	0.277	Co-occurrence
MYCL	1p34.3-p34.2	PRKACA	19p13.2-p13.11	-0.355	0.648	0.656	Mutual exclusivity
MYCL	1p34.3-p34.2	SMARCA4	19p13.2-p13.11	1.036	0.268	0.515	Co-occurrence
MYCL	1p34.3-p34.2	TPM4	19p13.2-p13.11	0.655	0.433	0.602	Co-occurrence
MYCL	1p34.3-p34.2	AKT2	19q11-q13.2	1.12	0.311	0.542	Co-occurrence
MYCL	1p34.3-p34.2	CCNE1	19q11-q13.2	2.032	0.032	0.203	Co-occurrence
MYCL	1p34.3-p34.2	CEBPA	19q11-q13.2	1.409	0.179	0.447	Co-occurrence
MYCL	1p34.3-p34.2	ARNT	1q21.1-q22	1.427	0.138	0.407	Co-occurrence
MYCL	1p34.3-p34.2	BCL9	1q21.1-q22	1.153	0.237	0.496	Co-occurrence
MYCL	1p34.3-p34.2	LMNA	1q21.1-q22	0.819	0.331	0.561	Co-occurrence
MYCL	1p34.3-p34.2	MLLT11	1q21.1-q22	1.427	0.138	0.407	Co-occurrence
MYCL	1p34.3-p34.2	MUC1	1q21.1-q22	1.76	0.084	0.355	Co-occurrence
MYCL	1p34.3-p34.2	TPM3	1q21.1-q22	0.797	0.393	0.58	Co-occurrence
MYCL	1p34.3-p34.2	ASXL1	20q11.21-q11.23	1.036	0.268	0.515	Co-occurrence
MYCL	1p34.3-p34.2	SDC4	20q13.12-q13.2	-0.201	0.689	0.689	Mutual exclusivity
MYCL	1p34.3-p34.2	SS18L1	20q13.33-q13.33	0.951	0.352	0.572	Co-occurrence
MYCL	1p34.3-p34.2	PAX8	2q14.1-q14.1	2.077	0.036	0.217	Co-occurrence
MYCL	1p34.3-p34.2	BCL6	3q26.1-q29	-0.132	0.637	0.655	Mutual exclusivity
MYCL	1p34.3-p34.2	EIF4A2	3q26.1-q29	-0.132	0.637	0.655	Mutual exclusivity
MYCL	1p34.3-p34.2	LPP	3q26.1-q29	-0.401	0.54	0.642	Mutual exclusivity
MYCL	1p34.3-p34.2	MAP3K13	3q26.1-q29	-0.314	0.572	0.648	Mutual exclusivity
MYCL	1p34.3-p34.2	MECOM	3q26.1-q29	0.827	0.281	0.529	Co-occurrence
MYCL	1p34.3-p34.2	PIK3CA	3q26.1-q29	0.441	0.46	0.617	Co-occurrence
MYCL	1p34.3-p34.2	SOX2	3q26.1-q29	-0.225	0.605	0.65	Mutual exclusivity
MYCL	1p34.3-p34.2	TBL1XR1	3q26.1-q29	0.622	0.395	0.582	Co-occurrence
MYCL	1p34.3-p34.2	TP63	3q26.1-q29	-0.225	0.605	0.65	Mutual exclusivity
MYCL	1p34.3-p34.2	IL7R	5p15.31-p15.2	0.951	0.352	0.572	Co-occurrence
MYCL	1p34.3-p34.2	LIFR	5p15.31-p15.2	1.12	0.311	0.542	Co-occurrence
MYCL	1p34.3-p34.2	HOOK3	8q12.1-q12.1	<-3	0.226	0.482	Mutual exclusivity
MYCL	1p34.3-p34.2	IKBKB	8q12.1-q12.1	<-3	0.177	0.447	Mutual exclusivity
MYCL	1p34.3-p34.2	KAT6A	8q12.1-q12.1	-0.036	0.669	0.673	Mutual exclusivity
MYCL	1p34.3-p34.2	NCOA2	8q12.1-q12.1	-0.201	0.689	0.689	Mutual exclusivity
MYCL	1p34.3-p34.2	TCEA1	8q12.1-q12.1	0.951	0.352	0.572	Co-occurrence
MYCL	1p34.3-p34.2	MYC	8q24.13-q24.3	0.271	0.522	0.635	Co-occurrence
MYCL	1p34.3-p34.2	NDRG1	8q24.13-q24.3	1.12	0.311	0.542	Co-occurrence
ARNT	1q21.1-q22	KAT6B	10q22.2-q22.3	2.433	0.012	0.096	Co-occurrence
BCL9	1q21.1-q22	KAT6B	10q22.2-q22.3	2.322	0.021	0.157	Co-occurrence
LMNA	1q21.1-q22	KAT6B	10q22.2-q22.3	0.631	0.389	0.58	Co-occurrence
MLLT11	1q21.1-q22	KAT6B	10q22.2-q22.3	1.837	0.054	0.27	Co-occurrence
MUC1	1q21.1-q22	KAT6B	10q22.2-q22.3	0	0.633	0.655	Mutual exclusivity
TPM3	1q21.1-q22	KAT6B	10q22.2-q22.3	0.628	0.44	0.602	Co-occurrence
BCL9	1q21.1-q22	CDK12	17q12-q21.1	0.965	0.285	0.533	Co-occurrence
BCL9	1q21.1-q22	ERBB2	17q12-q21.1	0.528	0.388	0.58	Co-occurrence
LMNA	1q21.1-q22	CDK12	17q12-q21.1	1.948	0.044	0.243	Co-occurrence
LMNA	1q21.1-q22	ERBB2	17q12-q21.1	2.518	0.002	0.022	Co-occurrence
MUC1	1q21.1-q22	CDK12	17q12-q21.1	0.848	0.319	0.548	Co-occurrence
MUC1	1q21.1-q22	ERBB2	17q12-q21.1	0.402	0.437	0.602	Co-occurrence
TPM3	1q21.1-q22	CDK12	17q12-q21.1	1.519	0.157	0.43	Co-occurrence
TPM3	1q21.1-q22	ERBB2	17q12-q21.1	1.134	0.197	0.467	Co-occurrence
ARNT	1q21.1-q22	KEAP1	19p13.2-p13.11	1.11	0.169	0.443	Co-occurrence
ARNT	1q21.1-q22	LYL1	19p13.2-p13.11	2.115	0.014	0.112	Co-occurrence
ARNT	1q21.1-q22	PRKACA	19p13.2-p13.11	1.216	0.18	0.447	Co-occurrence
ARNT	1q21.1-q22	SMARCA4	19p13.2-p13.11	0.831	0.249	0.508	Co-occurrence
ARNT	1q21.1-q22	TPM4	19p13.2-p13.11	0.857	0.274	0.521	Co-occurrence
BCL9	1q21.1-q22	BRD4	19p13.2-p13.11	1.322	0.121	0.385	Co-occurrence
BCL9	1q21.1-q22	CALR	19p13.2-p13.11	-0.188	0.617	0.65	Mutual exclusivity
BCL9	1q21.1-q22	DNAJB1	19p13.2-p13.11	0.64	0.383	0.58	Co-occurrence
BCL9	1q21.1-q22	DNM2	19p13.2-p13.11	0.641	0.345	0.572	Co-occurrence
BCL9	1q21.1-q22	JAK3	19p13.2-p13.11	1.487	0.122	0.385	Co-occurrence
BCL9	1q21.1-q22	KEAP1	19p13.2-p13.11	1.599	0.077	0.341	Co-occurrence
BCL9	1q21.1-q22	LYL1	19p13.2-p13.11	1.018	0.224	0.482	Co-occurrence
BCL9	1q21.1-q22	PRKACA	19p13.2-p13.11	0.965	0.285	0.533	Co-occurrence
BCL9	1q21.1-q22	SMARCA4	19p13.2-p13.11	0.759	0.304	0.539	Co-occurrence
BCL9	1q21.1-q22	TPM4	19p13.2-p13.11	1.317	0.153	0.429	Co-occurrence
LMNA	1q21.1-q22	BRD4	19p13.2-p13.11	0.943	0.214	0.482	Co-occurrence
LMNA	1q21.1-q22	CALR	19p13.2-p13.11	1.549	0.085	0.355	Co-occurrence
LMNA	1q21.1-q22	DNAJB1	19p13.2-p13.11	0.305	0.503	0.634	Co-occurrence
LMNA	1q21.1-q22	DNM2	19p13.2-p13.11	1.306	0.102	0.359	Co-occurrence
LMNA	1q21.1-q22	JAK3	19p13.2-p13.11	1.134	0.197	0.467	Co-occurrence
LMNA	1q21.1-q22	KEAP1	19p13.2-p13.11	1.741	0.045	0.243	Co-occurrence
LMNA	1q21.1-q22	LYL1	19p13.2-p13.11	2.241	0.011	0.089	Co-occurrence
LMNA	1q21.1-q22	PRKACA	19p13.2-p13.11	0.631	0.389	0.58	Co-occurrence
LMNA	1q21.1-q22	SMARCA4	19p13.2-p13.11	1.441	0.08	0.348	Co-occurrence
LMNA	1q21.1-q22	TPM4	19p13.2-p13.11	0.305	0.503	0.634	Co-occurrence
MLLT11	1q21.1-q22	JAK3	19p13.2-p13.11	1.028	0.225	0.482	Co-occurrence
MLLT11	1q21.1-q22	KEAP1	19p13.2-p13.11	1.11	0.169	0.443	Co-occurrence
MLLT11	1q21.1-q22	LYL1	19p13.2-p13.11	2.115	0.014	0.112	Co-occurrence
MLLT11	1q21.1-q22	PRKACA	19p13.2-p13.11	1.216	0.18	0.447	Co-occurrence
MLLT11	1q21.1-q22	SMARCA4	19p13.2-p13.11	0.831	0.249	0.508	Co-occurrence
MLLT11	1q21.1-q22	TPM4	19p13.2-p13.11	0.857	0.274	0.521	Co-occurrence
MUC1	1q21.1-q22	BRD4	19p13.2-p13.11	0.633	0.348	0.572	Co-occurrence
MUC1	1q21.1-q22	CALR	19p13.2-p13.11	0.522	0.424	0.602	Co-occurrence
MUC1	1q21.1-q22	DNAJB1	19p13.2-p13.11	1.193	0.181	0.447	Co-occurrence
MUC1	1q21.1-q22	DNM2	19p13.2-p13.11	0.515	0.393	0.58	Co-occurrence
MUC1	1q21.1-q22	JAK3	19p13.2-p13.11	1.363	0.145	0.416	Co-occurrence
MUC1	1q21.1-q22	KEAP1	19p13.2-p13.11	0.893	0.261	0.511	Co-occurrence
MUC1	1q21.1-q22	LYL1	19p13.2-p13.11	1.466	0.096	0.359	Co-occurrence
MUC1	1q21.1-q22	PRKACA	19p13.2-p13.11	0	0.633	0.655	Mutual exclusivity
MUC1	1q21.1-q22	SMARCA4	19p13.2-p13.11	0.633	0.348	0.572	Co-occurrence
MUC1	1q21.1-q22	TPM4	19p13.2-p13.11	0.522	0.424	0.602	Co-occurrence
TPM3	1q21.1-q22	BRD4	19p13.2-p13.11	0.678	0.372	0.579	Co-occurrence
TPM3	1q21.1-q22	CALR	19p13.2-p13.11	1.196	0.224	0.482	Co-occurrence
TPM3	1q21.1-q22	DNAJB1	19p13.2-p13.11	1.196	0.224	0.482	Co-occurrence
TPM3	1q21.1-q22	DNM2	19p13.2-p13.11	1.245	0.17	0.443	Co-occurrence
TPM3	1q21.1-q22	JAK3	19p13.2-p13.11	2.086	0.049	0.26	Co-occurrence
TPM3	1q21.1-q22	KEAP1	19p13.2-p13.11	2.255	0.024	0.162	Co-occurrence
TPM3	1q21.1-q22	LYL1	19p13.2-p13.11	2.255	0.024	0.162	Co-occurrence
TPM3	1q21.1-q22	PRKACA	19p13.2-p13.11	1.519	0.157	0.43	Co-occurrence
TPM3	1q21.1-q22	SMARCA4	19p13.2-p13.11	1.363	0.145	0.416	Co-occurrence
TPM3	1q21.1-q22	TPM4	19p13.2-p13.11	0.331	0.529	0.635	Co-occurrence
BCL9	1q21.1-q22	AKT2	19q11-q13.2	1.153	0.237	0.496	Co-occurrence
BCL9	1q21.1-q22	CCNE1	19q11-q13.2	0.775	0.249	0.508	Co-occurrence
BCL9	1q21.1-q22	CEBPA	19q11-q13.2	-1.541	0.27	0.517	Mutual exclusivity
LMNA	1q21.1-q22	AKT2	19q11-q13.2	-1.284	0.354	0.572	Mutual exclusivity
LMNA	1q21.1-q22	CCNE1	19q11-q13.2	-0.585	0.359	0.573	Mutual exclusivity
LMNA	1q21.1-q22	CEBPA	19q11-q13.2	0.807	0.289	0.535	Co-occurrence
MUC1	1q21.1-q22	AKT2	19q11-q13.2	0.17	0.581	0.648	Co-occurrence
MUC1	1q21.1-q22	CCNE1	19q11-q13.2	0.628	0.304	0.539	Co-occurrence
MUC1	1q21.1-q22	CEBPA	19q11-q13.2	0.379	0.475	0.622	Co-occurrence
TPM3	1q21.1-q22	AKT2	19q11-q13.2	0.797	0.393	0.58	Co-occurrence
TPM3	1q21.1-q22	CCNE1	19q11-q13.2	-0.252	0.551	0.648	Mutual exclusivity
TPM3	1q21.1-q22	CEBPA	19q11-q13.2	-1.052	0.429	0.602	Mutual exclusivity
ARNT	1q21.1-q22	LMNA	1q21.1-q22	>3	<0.001	<0.001	Co-occurrence
ARNT	1q21.1-q22	MUC1	1q21.1-q22	>3	<0.001	<0.001	Co-occurrence
ARNT	1q21.1-q22	TPM3	1q21.1-q22	>3	<0.001	<0.001	Co-occurrence
BCL9	1q21.1-q22	ARNT	1q21.1-q22	>3	<0.001	<0.001	Co-occurrence
BCL9	1q21.1-q22	LMNA	1q21.1-q22	>3	<0.001	0.005	Co-occurrence
BCL9	1q21.1-q22	MLLT11	1q21.1-q22	>3	<0.001	<0.001	Co-occurrence
BCL9	1q21.1-q22	MUC1	1q21.1-q22	>3	<0.001	<0.001	Co-occurrence
BCL9	1q21.1-q22	TPM3	1q21.1-q22	>3	<0.001	<0.001	Co-occurrence
LMNA	1q21.1-q22	MUC1	1q21.1-q22	>3	<0.001	<0.001	Co-occurrence
MLLT11	1q21.1-q22	ARNT	1q21.1-q22	>3	<0.001	<0.001	Co-occurrence
MLLT11	1q21.1-q22	LMNA	1q21.1-q22	>3	<0.001	<0.001	Co-occurrence
MLLT11	1q21.1-q22	MUC1	1q21.1-q22	>3	<0.001	<0.001	Co-occurrence
MLLT11	1q21.1-q22	TPM3	1q21.1-q22	>3	<0.001	<0.001	Co-occurrence
TPM3	1q21.1-q22	LMNA	1q21.1-q22	>3	<0.001	<0.001	Co-occurrence
TPM3	1q21.1-q22	MUC1	1q21.1-q22	>3	<0.001	<0.001	Co-occurrence
BCL9	1q21.1-q22	ASXL1	20q11.21-q11.23	-0.678	0.429	0.602	Mutual exclusivity
LMNA	1q21.1-q22	ASXL1	20q11.21-q11.23	1.914	0.023	0.158	Co-occurrence
LYL1	1q21.1-q22	ASXL1	20q11.21-q11.23	1.466	0.096	0.359	Co-occurrence
MUC1	1q21.1-q22	ASXL1	20q11.21-q11.23	1.7	0.048	0.257	Co-occurrence
TPM3	1q21.1-q22	ASXL1	20q11.21-q11.23	0.678	0.372	0.579	Co-occurrence
ARNT	1q21.1-q22	SDC4	20q13.12-q13.2	1.427	0.138	0.407	Co-occurrence
BCL9	1q21.1-q22	SDC4	20q13.12-q13.2	1.153	0.237	0.496	Co-occurrence
LMNA	1q21.1-q22	SDC4	20q13.12-q13.2	1.532	0.118	0.385	Co-occurrence
MLLT11	1q21.1-q22	SDC4	20q13.12-q13.2	0.719	0.363	0.573	Co-occurrence
MUC1	1q21.1-q22	SDC4	20q13.12-q13.2	0.17	0.581	0.648	Co-occurrence
TPM3	1q21.1-q22	SDC4	20q13.12-q13.2	0.797	0.393	0.58	Co-occurrence
ARNT	1q21.1-q22	SS18L1	20q13.33-q13.33	2.433	0.012	0.096	Co-occurrence
BCL9	1q21.1-q22	SS18L1	20q13.33-q13.33	1.675	0.094	0.359	Co-occurrence
LMNA	1q21.1-q22	SS18L1	20q13.33-q13.33	1.322	0.156	0.43	Co-occurrence
MLLT11	1q21.1-q22	SS18L1	20q13.33-q13.33	1.837	0.054	0.27	Co-occurrence
MUC1	1q21.1-q22	SS18L1	20q13.33-q13.33	2.807	0.005	0.044	Co-occurrence
TPM3	1q21.1-q22	SS18L1	20q13.33-q13.33	2.273	0.037	0.218	Co-occurrence
ARNT	1q21.1-q22	PAX8	2q14.1-q14.1	0.472	0.385	0.58	Co-occurrence
BCL9	1q21.1-q22	PAX8	2q14.1-q14.1	0.422	0.43	0.602	Co-occurrence
LMNA	1q21.1-q22	PAX8	2q14.1-q14.1	0.585	0.339	0.564	Co-occurrence
MLLT11	1q21.1-q22	PAX8	2q14.1-q14.1	0.472	0.385	0.58	Co-occurrence
MUC1	1q21.1-q22	PAX8	2q14.1-q14.1	0.831	0.249	0.508	Co-occurrence
TPM3	1q21.1-q22	PAX8	2q14.1-q14.1	0.36	0.484	0.622	Co-occurrence
ARNT	1q21.1-q22	LPP	3q26.1-q29	0.617	0.304	0.539	Co-occurrence
ARNT	1q21.1-q22	MAP3K13	3q26.1-q29	0.261	0.479	0.622	Co-occurrence
ARNT	1q21.1-q22	MECOM	3q26.1-q29	0.737	0.218	0.482	Co-occurrence
ARNT	1q21.1-q22	PIK3CA	3q26.1-q29	1.042	0.142	0.416	Co-occurrence
ARNT	1q21.1-q22	SOX2	3q26.1-q29	0.364	0.432	0.602	Co-occurrence
ARNT	1q21.1-q22	TBL1XR1	3q26.1-q29	0.828	0.225	0.482	Co-occurrence
ARNT	1q21.1-q22	TP63	3q26.1-q29	0.364	0.432	0.602	Co-occurrence
BCL9	1q21.1-q22	BCL6	3q26.1-q29	-0.202	0.57	0.648	Mutual exclusivity
BCL9	1q21.1-q22	EIF4A2	3q26.1-q29	-0.202	0.57	0.648	Mutual exclusivity
BCL9	1q21.1-q22	LPP	3q26.1-q29	0.127	0.553	0.648	Co-occurrence
BCL9	1q21.1-q22	MAP3K13	3q26.1-q29	0.222	0.513	0.635	Co-occurrence
BCL9	1q21.1-q22	MECOM	3q26.1-q29	0.582	0.315	0.548	Co-occurrence
BCL9	1q21.1-q22	PIK3CA	3q26.1-q29	1.145	0.138	0.407	Co-occurrence
BCL9	1q21.1-q22	SOX2	3q26.1-q29	0.319	0.472	0.622	Co-occurrence
BCL9	1q21.1-q22	TBL1XR1	3q26.1-q29	0.859	0.241	0.503	Co-occurrence
BCL9	1q21.1-q22	TP63	3q26.1-q29	0.319	0.472	0.622	Co-occurrence
LMNA	1q21.1-q22	BCL6	3q26.1-q29	-0.543	0.42	0.602	Mutual exclusivity
LMNA	1q21.1-q22	EIF4A2	3q26.1-q29	-0.543	0.42	0.602	Mutual exclusivity
LMNA	1q21.1-q22	LPP	3q26.1-q29	-0.234	0.527	0.635	Mutual exclusivity
LMNA	1q21.1-q22	MAP3K13	3q26.1-q29	-0.139	0.572	0.648	Mutual exclusivity
LMNA	1q21.1-q22	MECOM	3q26.1-q29	0.886	0.167	0.443	Co-occurrence
LMNA	1q21.1-q22	PIK3CA	3q26.1-q29	0.737	0.258	0.511	Co-occurrence
LMNA	1q21.1-q22	SOX2	3q26.1-q29	-0.041	0.617	0.65	Mutual exclusivity
LMNA	1q21.1-q22	TBL1XR1	3q26.1-q29	0.948	0.188	0.456	Co-occurrence
LMNA	1q21.1-q22	TP63	3q26.1-q29	-0.041	0.617	0.65	Mutual exclusivity
MLLT11	1q21.1-q22	LPP	3q26.1-q29	1.042	0.142	0.416	Co-occurrence
MLLT11	1q21.1-q22	MAP3K13	3q26.1-q29	0.72	0.264	0.514	Co-occurrence
MLLT11	1q21.1-q22	MECOM	3q26.1-q29	0.737	0.218	0.482	Co-occurrence
MLLT11	1q21.1-q22	PIK3CA	3q26.1-q29	1.449	0.053	0.27	Co-occurrence
MLLT11	1q21.1-q22	SOX2	3q26.1-q29	0.828	0.225	0.482	Co-occurrence
MLLT11	1q21.1-q22	TBL1XR1	3q26.1-q29	1.263	0.093	0.359	Co-occurrence
MLLT11	1q21.1-q22	TP63	3q26.1-q29	0.828	0.225	0.482	Co-occurrence
MUC1	1q21.1-q22	BCL6	3q26.1-q29	-0.322	0.518	0.635	Mutual exclusivity
MUC1	1q21.1-q22	EIF4A2	3q26.1-q29	-0.322	0.518	0.635	Mutual exclusivity
MUC1	1q21.1-q22	LPP	3q26.1-q29	0.523	0.365	0.573	Co-occurrence
MUC1	1q21.1-q22	MAP3K13	3q26.1-q29	0.094	0.567	0.648	Co-occurrence
MUC1	1q21.1-q22	MECOM	3q26.1-q29	0.421	0.385	0.58	Co-occurrence
MUC1	1q21.1-q22	PIK3CA	3q26.1-q29	1	0.174	0.447	Co-occurrence
MUC1	1q21.1-q22	SOX2	3q26.1-q29	0.193	0.525	0.635	Co-occurrence
MUC1	1q21.1-q22	TBL1XR1	3q26.1-q29	0.724	0.287	0.533	Co-occurrence
MUC1	1q21.1-q22	TP63	3q26.1-q29	0.193	0.525	0.635	Co-occurrence
TPM3	1q21.1-q22	BCL6	3q26.1-q29	0.36	0.484	0.622	Co-occurrence
TPM3	1q21.1-q22	EIF4A2	3q26.1-q29	0.36	0.484	0.622	Co-occurrence
TPM3	1q21.1-q22	LPP	3q26.1-q29	1.322	0.128	0.393	Co-occurrence
TPM3	1q21.1-q22	MAP3K13	3q26.1-q29	0.83	0.286	0.533	Co-occurrence
TPM3	1q21.1-q22	MECOM	3q26.1-q29	0.893	0.229	0.485	Co-occurrence
TPM3	1q21.1-q22	PIK3CA	3q26.1-q29	1.874	0.038	0.219	Co-occurrence
TPM3	1q21.1-q22	SOX2	3q26.1-q29	0.927	0.255	0.508	Co-occurrence
TPM3	1q21.1-q22	TBL1XR1	3q26.1-q29	1.52	0.092	0.359	Co-occurrence
TPM3	1q21.1-q22	TP63	3q26.1-q29	0.927	0.255	0.508	Co-occurrence
ARNT	1q21.1-q22	LIFR	5p15.31-p15.2	0.719	0.363	0.573	Co-occurrence
BCL9	1q21.1-q22	IL7R	5p15.31-p15.2	0.965	0.285	0.533	Co-occurrence
BCL9	1q21.1-q22	LIFR	5p15.31-p15.2	1.153	0.237	0.496	Co-occurrence
LMNA	1q21.1-q22	IL7R	5p15.31-p15.2	1.948	0.044	0.243	Co-occurrence
LMNA	1q21.1-q22	LIFR	5p15.31-p15.2	1.532	0.118	0.385	Co-occurrence
MLLT11	1q21.1-q22	IL7R	5p15.31-p15.2	1.216	0.18	0.447	Co-occurrence
MLLT11	1q21.1-q22	LIFR	5p15.31-p15.2	0.719	0.363	0.573	Co-occurrence
MUC1	1q21.1-q22	IL7R	5p15.31-p15.2	0	0.633	0.655	Mutual exclusivity
MUC1	1q21.1-q22	LIFR	5p15.31-p15.2	0.17	0.581	0.648	Co-occurrence
TPM3	1q21.1-q22	IL7R	5p15.31-p15.2	0.628	0.44	0.602	Co-occurrence
TPM3	1q21.1-q22	LIFR	5p15.31-p15.2	0.797	0.393	0.58	Co-occurrence
ARNT	1q21.1-q22	NCOA2	8q12.1-q12.1	0.719	0.363	0.573	Co-occurrence
ARNT	1q21.1-q22	TCEA1	8q12.1-q12.1	0.531	0.424	0.602	Co-occurrence
BCL9	1q21.1-q22	HOOK3	8q12.1-q12.1	0.796	0.334	0.564	Co-occurrence
BCL9	1q21.1-q22	IKBKB	8q12.1-q12.1	0.496	0.432	0.602	Co-occurrence
BCL9	1q21.1-q22	KAT6A	8q12.1-q12.1	1.078	0.176	0.447	Co-occurrence
BCL9	1q21.1-q22	NCOA2	8q12.1-q12.1	0.281	0.546	0.647	Co-occurrence
BCL9	1q21.1-q22	TCEA1	8q12.1-q12.1	0.111	0.598	0.65	Co-occurrence
LMNA	1q21.1-q22	HOOK3	8q12.1-q12.1	1.737	0.063	0.3	Co-occurrence
LMNA	1q21.1-q22	IKBKB	8q12.1-q12.1	1.911	0.032	0.202	Co-occurrence
LMNA	1q21.1-q22	KAT6A	8q12.1-q12.1	1.18	0.128	0.393	Co-occurrence
LMNA	1q21.1-q22	NCOA2	8q12.1-q12.1	1.532	0.118	0.385	Co-occurrence
LMNA	1q21.1-q22	TCEA1	8q12.1-q12.1	1.948	0.044	0.243	Co-occurrence
MLLT11	1q21.1-q22	KAT6A	8q12.1-q12.1	0.062	0.58	0.648	Co-occurrence
MLLT11	1q21.1-q22	NCOA2	8q12.1-q12.1	0.719	0.363	0.573	Co-occurrence
MLLT11	1q21.1-q22	TCEA1	8q12.1-q12.1	0.531	0.424	0.602	Co-occurrence
MUC1	1q21.1-q22	HOOK3	8q12.1-q12.1	1.979	0.04	0.232	Co-occurrence
MUC1	1q21.1-q22	IKBKB	8q12.1-q12.1	2.17	0.018	0.136	Co-occurrence
MUC1	1q21.1-q22	KAT6A	8q12.1-q12.1	1.441	0.08	0.348	Co-occurrence
MUC1	1q21.1-q22	NCOA2	8q12.1-q12.1	0.17	0.581	0.648	Co-occurrence
MUC1	1q21.1-q22	TCEA1	8q12.1-q12.1	1.55	0.113	0.377	Co-occurrence
TPM3	1q21.1-q22	HOOK3	8q12.1-q12.1	1.35	0.19	0.456	Co-occurrence
TPM3	1q21.1-q22	IKBKB	8q12.1-q12.1	1.053	0.26	0.511	Co-occurrence
TPM3	1q21.1-q22	KAT6A	8q12.1-q12.1	1.134	0.197	0.467	Co-occurrence
TPM3	1q21.1-q22	NCOA2	8q12.1-q12.1	<-3	0.226	0.482	Mutual exclusivity
TPM3	1q21.1-q22	TCEA1	8q12.1-q12.1	0.628	0.44	0.602	Co-occurrence
ARNT	1q21.1-q22	MYC	8q24.13-q24.3	1.238	0.085	0.355	Co-occurrence
ARNT	1q21.1-q22	NDRG1	8q24.13-q24.3	-0.132	0.637	0.655	Mutual exclusivity
BCL9	1q21.1-q22	MYC	8q24.13-q24.3	0.953	0.19	0.456	Co-occurrence
BCL9	1q21.1-q22	NDRG1	8q24.13-q24.3	-0.982	0.454	0.616	Mutual exclusivity
LMNA	1q21.1-q22	MYC	8q24.13-q24.3	0.968	0.164	0.443	Co-occurrence
LMNA	1q21.1-q22	NDRG1	8q24.13-q24.3	2.188	0.029	0.19	Co-occurrence
MLLT11	1q21.1-q22	MYC	8q24.13-q24.3	1.238	0.085	0.355	Co-occurrence
MLLT11	1q21.1-q22	NDRG1	8q24.13-q24.3	-0.132	0.637	0.655	Mutual exclusivity
MUC1	1q21.1-q22	MYC	8q24.13-q24.3	-0.179	0.554	0.648	Mutual exclusivity
MUC1	1q21.1-q22	NDRG1	8q24.13-q24.3	0.17	0.581	0.648	Co-occurrence
TPM3	1q21.1-q22	MYC	8q24.13-q24.3	-0.091	0.617	0.65	Mutual exclusivity
TPM3	1q21.1-q22	NDRG1	8q24.13-q24.3	<-3	0.226	0.482	Mutual exclusivity
ASXL1	20q11.21-q11.23	SDC4	20q13.12-q13.2	1.036	0.268	0.515	Co-occurrence
ASXL1	20q11.21-q11.23	SS18L1	20q13.33-q13.33	1.55	0.113	0.377	Co-occurrence
PAX8	2q14.1-q14.1	KAT6B	10q22.2-q22.3	<-3	0.064	0.3	Mutual exclusivity
PAX8	2q14.1-q14.1	CDK12	17q12-q21.1	1.216	0.18	0.447	Co-occurrence
PAX8	2q14.1-q14.1	ERBB2	17q12-q21.1	0.062	0.58	0.648	Co-occurrence
PAX8	2q14.1-q14.1	BRD4	19p13.2-p13.11	1.322	0.1	0.359	Co-occurrence
PAX8	2q14.1-q14.1	CALR	19p13.2-p13.11	2.515	0.006	0.051	Co-occurrence
PAX8	2q14.1-q14.1	DNAJB1	19p13.2-p13.11	>3	<0.001	0.009	Co-occurrence
PAX8	2q14.1-q14.1	DNM2	19p13.2-p13.11	0.704	0.293	0.538	Co-occurrence
PAX8	2q14.1-q14.1	JAK3	19p13.2-p13.11	0.36	0.484	0.622	Co-occurrence
PAX8	2q14.1-q14.1	KEAP1	19p13.2-p13.11	-0.076	0.622	0.653	Mutual exclusivity
PAX8	2q14.1-q14.1	LYL1	19p13.2-p13.11	2.115	0.014	0.112	Co-occurrence
PAX8	2q14.1-q14.1	PRKACA	19p13.2-p13.11	1.837	0.054	0.27	Co-occurrence
PAX8	2q14.1-q14.1	SMARCA4	19p13.2-p13.11	1.322	0.1	0.359	Co-occurrence
PAX8	2q14.1-q14.1	TPM4	19p13.2-p13.11	0.857	0.274	0.521	Co-occurrence
PAX8	2q14.1-q14.1	AKT2	19q11-q13.2	2.077	0.036	0.217	Co-occurrence
PAX8	2q14.1-q14.1	CCNE1	19q11-q13.2	1.424	0.049	0.257	Co-occurrence
PAX8	2q14.1-q14.1	CEBPA	19q11-q13.2	0.059	0.595	0.65	Co-occurrence
PAX8	2q14.1-q14.1	ASXL1	20q11.21-q11.23	1.322	0.1	0.359	Co-occurrence
PAX8	2q14.1-q14.1	SDC4	20q13.12-q13.2	0.719	0.363	0.573	Co-occurrence
PAX8	2q14.1-q14.1	SS18L1	20q13.33-q13.33	1.837	0.054	0.27	Co-occurrence
PAX8	2q14.1-q14.1	BCL6	3q26.1-q29	0.941	0.189	0.456	Co-occurrence
PAX8	2q14.1-q14.1	EIF4A2	3q26.1-q29	0.941	0.189	0.456	Co-occurrence
PAX8	2q14.1-q14.1	LPP	3q26.1-q29	1.042	0.142	0.416	Co-occurrence
PAX8	2q14.1-q14.1	MAP3K13	3q26.1-q29	0.72	0.264	0.514	Co-occurrence
PAX8	2q14.1-q14.1	MECOM	3q26.1-q29	0.737	0.218	0.482	Co-occurrence
PAX8	2q14.1-q14.1	PIK3CA	3q26.1-q29	0.617	0.304	0.539	Co-occurrence
PAX8	2q14.1-q14.1	SOX2	3q26.1-q29	0.828	0.225	0.482	Co-occurrence
PAX8	2q14.1-q14.1	TBL1XR1	3q26.1-q29	1.263	0.093	0.359	Co-occurrence
PAX8	2q14.1-q14.1	TP63	3q26.1-q29	1.263	0.093	0.359	Co-occurrence
PAX8	2q14.1-q14.1	IL7R	5p15.31-p15.2	-1.533	0.274	0.521	Mutual exclusivity
PAX8	2q14.1-q14.1	LIFR	5p15.31-p15.2	-1.377	0.325	0.554	Mutual exclusivity
PAX8	2q14.1-q14.1	HOOK3	8q12.1-q12.1	0.36	0.484	0.622	Co-occurrence
PAX8	2q14.1-q14.1	IKBKB	8q12.1-q12.1	0.059	0.595	0.65	Co-occurrence
PAX8	2q14.1-q14.1	KAT6A	8q12.1-q12.1	0.585	0.339	0.564	Co-occurrence
PAX8	2q14.1-q14.1	NCOA2	8q12.1-q12.1	1.427	0.138	0.407	Co-occurrence
PAX8	2q14.1-q14.1	TCEA1	8q12.1-q12.1	1.216	0.18	0.447	Co-occurrence
PAX8	2q14.1-q14.1	MYC	8q24.13-q24.3	0.422	0.389	0.58	Co-occurrence
PAX8	2q14.1-q14.1	NDRG1	8q24.13-q24.3	1.427	0.138	0.407	Co-occurrence
BCL6	3q26.1-q29	KAT6B	10q22.2-q22.3	<-3	0.064	0.3	Mutual exclusivity
EIF4A2	3q26.1-q29	KAT6B	10q22.2-q22.3	<-3	0.064	0.3	Mutual exclusivity
LPP	3q26.1-q29	KAT6B	10q22.2-q22.3	<-3	0.041	0.233	Mutual exclusivity
MAP3K13	3q26.1-q29	KAT6B	10q22.2-q22.3	-1.709	0.223	0.482	Mutual exclusivity
MECOM	3q26.1-q29	KAT6B	10q22.2-q22.3	-0.652	0.384	0.58	Mutual exclusivity
PIK3CA	3q26.1-q29	KAT6B	10q22.2-q22.3	-1.793	0.2	0.469	Mutual exclusivity
SOX2	3q26.1-q29	KAT6B	10q22.2-q22.3	-1.623	0.248	0.508	Mutual exclusivity
TBL1XR1	3q26.1-q29	KAT6B	10q22.2-q22.3	-1.623	0.248	0.508	Mutual exclusivity
TP63	3q26.1-q29	KAT6B	10q22.2-q22.3	<-3	0.055	0.271	Mutual exclusivity
BCL6	3q26.1-q29	CDK12	17q12-q21.1	1.216	0.18	0.447	Co-occurrence
BCL6	3q26.1-q29	ERBB2	17q12-q21.1	0.062	0.58	0.648	Co-occurrence
EIF4A2	3q26.1-q29	CDK12	17q12-q21.1	1.216	0.18	0.447	Co-occurrence
EIF4A2	3q26.1-q29	ERBB2	17q12-q21.1	0.062	0.58	0.648	Co-occurrence
LPP	3q26.1-q29	CDK12	17q12-q21.1	1.533	0.093	0.359	Co-occurrence
LPP	3q26.1-q29	ERBB2	17q12-q21.1	0.276	0.473	0.622	Co-occurrence
MAP3K13	3q26.1-q29	CDK12	17q12-q21.1	1.019	0.231	0.49	Co-occurrence
MAP3K13	3q26.1-q29	ERBB2	17q12-q21.1	-0.139	0.572	0.648	Mutual exclusivity
MECOM	3q26.1-q29	CDK12	17q12-q21.1	2.939	0.002	0.022	Co-occurrence
MECOM	3q26.1-q29	ERBB2	17q12-q21.1	1.623	0.024	0.163	Co-occurrence
MLLT11	3q26.1-q29	CDK12	17q12-q21.1	0.531	0.424	0.602	Co-occurrence
MLLT11	3q26.1-q29	ERBB2	17q12-q21.1	0.062	0.58	0.648	Co-occurrence
PIK3CA	3q26.1-q29	CDK12	17q12-q21.1	0.926	0.259	0.511	Co-occurrence
PIK3CA	3q26.1-q29	ERBB2	17q12-q21.1	0.276	0.473	0.622	Co-occurrence
SOX2	3q26.1-q29	CDK12	17q12-q21.1	1.115	0.205	0.473	Co-occurrence
SOX2	3q26.1-q29	ERBB2	17q12-q21.1	-0.041	0.617	0.65	Mutual exclusivity
TBL1XR1	3q26.1-q29	CDK12	17q12-q21.1	1.115	0.205	0.473	Co-occurrence
TBL1XR1	3q26.1-q29	ERBB2	17q12-q21.1	-0.041	0.617	0.65	Mutual exclusivity
TP63	3q26.1-q29	CDK12	17q12-q21.1	1.731	0.066	0.303	Co-occurrence
TP63	3q26.1-q29	ERBB2	17q12-q21.1	0.477	0.383	0.58	Co-occurrence
BCL6	3q26.1-q29	BRD4	19p13.2-p13.11	1.322	0.1	0.359	Co-occurrence
BCL6	3q26.1-q29	CALR	19p13.2-p13.11	1.437	0.103	0.359	Co-occurrence
BCL6	3q26.1-q29	DNAJB1	19p13.2-p13.11	2.515	0.006	0.051	Co-occurrence
BCL6	3q26.1-q29	DNM2	19p13.2-p13.11	-0.435	0.468	0.622	Mutual exclusivity
BCL6	3q26.1-q29	JAK3	19p13.2-p13.11	1.626	0.076	0.341	Co-occurrence
BCL6	3q26.1-q29	KEAP1	19p13.2-p13.11	-0.865	0.355	0.572	Mutual exclusivity
BCL6	3q26.1-q29	LYL1	19p13.2-p13.11	1.11	0.169	0.443	Co-occurrence
BCL6	3q26.1-q29	PRKACA	19p13.2-p13.11	1.837	0.054	0.27	Co-occurrence
BCL6	3q26.1-q29	SMARCA4	19p13.2-p13.11	0.295	0.482	0.622	Co-occurrence
BCL6	3q26.1-q29	TPM4	19p13.2-p13.11	1.437	0.103	0.359	Co-occurrence
EIF4A2	3q26.1-q29	BRD4	19p13.2-p13.11	1.322	0.1	0.359	Co-occurrence
EIF4A2	3q26.1-q29	CALR	19p13.2-p13.11	1.437	0.103	0.359	Co-occurrence
EIF4A2	3q26.1-q29	DNAJB1	19p13.2-p13.11	2.515	0.006	0.051	Co-occurrence
EIF4A2	3q26.1-q29	DNM2	19p13.2-p13.11	-0.435	0.468	0.622	Mutual exclusivity
EIF4A2	3q26.1-q29	JAK3	19p13.2-p13.11	1.626	0.076	0.341	Co-occurrence
EIF4A2	3q26.1-q29	KEAP1	19p13.2-p13.11	-0.865	0.355	0.572	Mutual exclusivity
EIF4A2	3q26.1-q29	LYL1	19p13.2-p13.11	1.11	0.169	0.443	Co-occurrence
EIF4A2	3q26.1-q29	PRKACA	19p13.2-p13.11	1.837	0.054	0.27	Co-occurrence
EIF4A2	3q26.1-q29	SMARCA4	19p13.2-p13.11	0.295	0.482	0.622	Co-occurrence
EIF4A2	3q26.1-q29	TPM4	19p13.2-p13.11	1.437	0.103	0.359	Co-occurrence
LPP	3q26.1-q29	BRD4	19p13.2-p13.11	1	0.174	0.447	Co-occurrence
LPP	3q26.1-q29	CALR	19p13.2-p13.11	1.133	0.168	0.443	Co-occurrence
LPP	3q26.1-q29	DNAJB1	19p13.2-p13.11	2.179	0.014	0.109	Co-occurrence
LPP	3q26.1-q29	DNM2	19p13.2-p13.11	-0.12	0.581	0.648	Mutual exclusivity
LPP	3q26.1-q29	JAK3	19p13.2-p13.11	1.874	0.038	0.219	Co-occurrence
LPP	3q26.1-q29	KEAP1	19p13.2-p13.11	-0.358	0.503	0.634	Mutual exclusivity
LPP	3q26.1-q29	LYL1	19p13.2-p13.11	0.804	0.261	0.511	Co-occurrence
LPP	3q26.1-q29	PRKACA	19p13.2-p13.11	1.533	0.093	0.359	Co-occurrence
LPP	3q26.1-q29	SMARCA4	19p13.2-p13.11	0.523	0.365	0.573	Co-occurrence
LPP	3q26.1-q29	TPM4	19p13.2-p13.11	1.133	0.168	0.443	Co-occurrence
MAP3K13	3q26.1-q29	BRD4	19p13.2-p13.11	1.102	0.147	0.42	Co-occurrence
MAP3K13	3q26.1-q29	CALR	19p13.2-p13.11	1.23	0.144	0.416	Co-occurrence
MAP3K13	3q26.1-q29	DNAJB1	19p13.2-p13.11	2.285	0.01	0.089	Co-occurrence
MAP3K13	3q26.1-q29	DNM2	19p13.2-p13.11	-0.628	0.382	0.58	Mutual exclusivity
MAP3K13	3q26.1-q29	JAK3	19p13.2-p13.11	1.419	0.109	0.373	Co-occurrence
MAP3K13	3q26.1-q29	KEAP1	19p13.2-p13.11	-1.05	0.286	0.533	Mutual exclusivity
MAP3K13	3q26.1-q29	LYL1	19p13.2-p13.11	0.902	0.228	0.485	Co-occurrence
MAP3K13	3q26.1-q29	PRKACA	19p13.2-p13.11	1.63	0.079	0.346	Co-occurrence
MAP3K13	3q26.1-q29	SMARCA4	19p13.2-p13.11	0.094	0.567	0.648	Co-occurrence
MAP3K13	3q26.1-q29	TPM4	19p13.2-p13.11	1.23	0.144	0.416	Co-occurrence
MECOM	3q26.1-q29	BRD4	19p13.2-p13.11	0.421	0.385	0.58	Co-occurrence
MECOM	3q26.1-q29	CALR	19p13.2-p13.11	0.678	0.3	0.539	Co-occurrence
MECOM	3q26.1-q29	DNAJB1	19p13.2-p13.11	1.164	0.133	0.404	Co-occurrence
MECOM	3q26.1-q29	DNM2	19p13.2-p13.11	0.664	0.262	0.513	Co-occurrence
MECOM	3q26.1-q29	JAK3	19p13.2-p13.11	0.368	0.448	0.61	Co-occurrence
MECOM	3q26.1-q29	KEAP1	19p13.2-p13.11	0.757	0.248	0.508	Co-occurrence
MECOM	3q26.1-q29	LYL1	19p13.2-p13.11	1.193	0.108	0.372	Co-occurrence
MECOM	3q26.1-q29	PRKACA	19p13.2-p13.11	1.138	0.164	0.443	Co-occurrence
MECOM	3q26.1-q29	SMARCA4	19p13.2-p13.11	1.222	0.087	0.359	Co-occurrence
MECOM	3q26.1-q29	TPM4	19p13.2-p13.11	0.678	0.3	0.539	Co-occurrence
MLLT11	3q26.1-q29	BRD4	19p13.2-p13.11	1.322	0.1	0.359	Co-occurrence
MLLT11	3q26.1-q29	CALR	19p13.2-p13.11	1.437	0.103	0.359	Co-occurrence
MLLT11	3q26.1-q29	DNAJB1	19p13.2-p13.11	1.437	0.103	0.359	Co-occurrence
MLLT11	3q26.1-q29	DNM2	19p13.2-p13.11	0.704	0.293	0.538	Co-occurrence
PIK3CA	3q26.1-q29	BRD4	19p13.2-p13.11	1	0.174	0.447	Co-occurrence
PIK3CA	3q26.1-q29	CALR	19p13.2-p13.11	1.133	0.168	0.443	Co-occurrence
PIK3CA	3q26.1-q29	DNAJB1	19p13.2-p13.11	2.179	0.014	0.109	Co-occurrence
PIK3CA	3q26.1-q29	DNM2	19p13.2-p13.11	-0.12	0.581	0.648	Mutual exclusivity
PIK3CA	3q26.1-q29	JAK3	19p13.2-p13.11	1.322	0.128	0.393	Co-occurrence
PIK3CA	3q26.1-q29	KEAP1	19p13.2-p13.11	-0.358	0.503	0.634	Mutual exclusivity
PIK3CA	3q26.1-q29	LYL1	19p13.2-p13.11	1.779	0.033	0.203	Co-occurrence
PIK3CA	3q26.1-q29	PRKACA	19p13.2-p13.11	2.115	0.024	0.163	Co-occurrence
PIK3CA	3q26.1-q29	SMARCA4	19p13.2-p13.11	0.523	0.365	0.573	Co-occurrence
PIK3CA	3q26.1-q29	TPM4	19p13.2-p13.11	1.133	0.168	0.443	Co-occurrence
SOX2	3q26.1-q29	BRD4	19p13.2-p13.11	1.209	0.122	0.385	Co-occurrence
SOX2	3q26.1-q29	CALR	19p13.2-p13.11	1.331	0.123	0.385	Co-occurrence
SOX2	3q26.1-q29	DNAJB1	19p13.2-p13.11	2.397	0.008	0.068	Co-occurrence
SOX2	3q26.1-q29	DNM2	19p13.2-p13.11	-0.534	0.424	0.602	Mutual exclusivity
SOX2	3q26.1-q29	JAK3	19p13.2-p13.11	1.52	0.092	0.359	Co-occurrence
SOX2	3q26.1-q29	KEAP1	19p13.2-p13.11	-0.959	0.319	0.548	Mutual exclusivity
SOX2	3q26.1-q29	LYL1	19p13.2-p13.11	1.004	0.198	0.467	Co-occurrence
SOX2	3q26.1-q29	PRKACA	19p13.2-p13.11	1.731	0.066	0.303	Co-occurrence
SOX2	3q26.1-q29	SMARCA4	19p13.2-p13.11	0.193	0.525	0.635	Co-occurrence
SOX2	3q26.1-q29	TPM4	19p13.2-p13.11	1.331	0.123	0.385	Co-occurrence
TBL1XR1	3q26.1-q29	BRD4	19p13.2-p13.11	1.209	0.122	0.385	Co-occurrence
TBL1XR1	3q26.1-q29	CALR	19p13.2-p13.11	1.87	0.036	0.217	Co-occurrence
TBL1XR1	3q26.1-q29	DNAJB1	19p13.2-p13.11	2.397	0.008	0.068	Co-occurrence
TBL1XR1	3q26.1-q29	DNM2	19p13.2-p13.11	-0.534	0.424	0.602	Mutual exclusivity
TBL1XR1	3q26.1-q29	JAK3	19p13.2-p13.11	0.927	0.255	0.508	Co-occurrence
TBL1XR1	3q26.1-q29	KEAP1	19p13.2-p13.11	-0.959	0.319	0.548	Mutual exclusivity
TBL1XR1	3q26.1-q29	LYL1	19p13.2-p13.11	1.997	0.019	0.144	Co-occurrence
TBL1XR1	3q26.1-q29	PRKACA	19p13.2-p13.11	2.322	0.015	0.114	Co-occurrence
TBL1XR1	3q26.1-q29	SMARCA4	19p13.2-p13.11	0.193	0.525	0.635	Co-occurrence
TBL1XR1	3q26.1-q29	TPM4	19p13.2-p13.11	1.331	0.123	0.385	Co-occurrence
TP63	3q26.1-q29	BRD4	19p13.2-p13.11	1.209	0.122	0.385	Co-occurrence
TP63	3q26.1-q29	CALR	19p13.2-p13.11	1.331	0.123	0.385	Co-occurrence
TP63	3q26.1-q29	DNAJB1	19p13.2-p13.11	2.397	0.008	0.068	Co-occurrence
TP63	3q26.1-q29	DNM2	19p13.2-p13.11	0.073	0.576	0.648	Co-occurrence
TP63	3q26.1-q29	JAK3	19p13.2-p13.11	1.52	0.092	0.359	Co-occurrence
TP63	3q26.1-q29	KEAP1	19p13.2-p13.11	-0.174	0.582	0.648	Mutual exclusivity
TP63	3q26.1-q29	LYL1	19p13.2-p13.11	1.004	0.198	0.467	Co-occurrence
TP63	3q26.1-q29	PRKACA	19p13.2-p13.11	1.731	0.066	0.303	Co-occurrence
TP63	3q26.1-q29	SMARCA4	19p13.2-p13.11	0.724	0.287	0.533	Co-occurrence
TP63	3q26.1-q29	TPM4	19p13.2-p13.11	1.331	0.123	0.385	Co-occurrence
BCL6	3q26.1-q29	AKT2	19q11-q13.2	1.427	0.138	0.407	Co-occurrence
BCL6	3q26.1-q29	CCNE1	19q11-q13.2	1.801	0.015	0.113	Co-occurrence
BCL6	3q26.1-q29	CEBPA	19q11-q13.2	2.304	0.009	0.08	Co-occurrence
EIF4A2	3q26.1-q29	AKT2	19q11-q13.2	1.427	0.138	0.407	Co-occurrence
EIF4A2	3q26.1-q29	CCNE1	19q11-q13.2	1.801	0.015	0.113	Co-occurrence
EIF4A2	3q26.1-q29	CEBPA	19q11-q13.2	2.304	0.009	0.08	Co-occurrence
LPP	3q26.1-q29	AKT2	19q11-q13.2	1.138	0.204	0.473	Co-occurrence
LPP	3q26.1-q29	CCNE1	19q11-q13.2	1.389	0.045	0.243	Co-occurrence
LPP	3q26.1-q29	CEBPA	19q11-q13.2	1.968	0.022	0.157	Co-occurrence
LYL1	3q26.1-q29	AKT2	19q11-q13.2	0.398	0.51	0.635	Co-occurrence
LYL1	3q26.1-q29	CCNE1	19q11-q13.2	0.447	0.401	0.587	Co-occurrence
LYL1	3q26.1-q29	CEBPA	19q11-q13.2	0.621	0.389	0.58	Co-occurrence
MAP3K13	3q26.1-q29	AKT2	19q11-q13.2	1.871	0.054	0.27	Co-occurrence
MAP3K13	3q26.1-q29	CCNE1	19q11-q13.2	1.518	0.032	0.202	Co-occurrence
MAP3K13	3q26.1-q29	CEBPA	19q11-q13.2	2.571	0.003	0.03	Co-occurrence
MECOM	3q26.1-q29	AKT2	19q11-q13.2	2.037	0.031	0.197	Co-occurrence
MECOM	3q26.1-q29	CCNE1	19q11-q13.2	0.807	0.156	0.43	Co-occurrence
MECOM	3q26.1-q29	CEBPA	19q11-q13.2	1.408	0.073	0.328	Co-occurrence
MLLT11	3q26.1-q29	AKT2	19q11-q13.2	0.719	0.363	0.573	Co-occurrence
MLLT11	3q26.1-q29	CCNE1	19q11-q13.2	1.044	0.128	0.393	Co-occurrence
MLLT11	3q26.1-q29	CEBPA	19q11-q13.2	0.059	0.595	0.65	Co-occurrence
PIK3CA	3q26.1-q29	AKT2	19q11-q13.2	1.774	0.064	0.3	Co-occurrence
PIK3CA	3q26.1-q29	CCNE1	19q11-q13.2	1.037	0.116	0.385	Co-occurrence
PIK3CA	3q26.1-q29	CEBPA	19q11-q13.2	1.968	0.022	0.157	Co-occurrence
PRKACA	3q26.1-q29	AKT2	19q11-q13.2	1.874	0.104	0.359	Co-occurrence
PRKACA	3q26.1-q29	CCNE1	19q11-q13.2	1.181	0.165	0.443	Co-occurrence
PRKACA	3q26.1-q29	CEBPA	19q11-q13.2	1.222	0.218	0.482	Co-occurrence
SMARCA4	3q26.1-q29	AKT2	19q11-q13.2	-1.087	0.419	0.602	Mutual exclusivity
SMARCA4	3q26.1-q29	CCNE1	19q11-q13.2	0.164	0.526	0.635	Co-occurrence
SMARCA4	3q26.1-q29	CEBPA	19q11-q13.2	0.379	0.475	0.622	Co-occurrence
SOX2	3q26.1-q29	AKT2	19q11-q13.2	1.971	0.045	0.243	Co-occurrence
SOX2	3q26.1-q29	CCNE1	19q11-q13.2	1.655	0.022	0.157	Co-occurrence
SOX2	3q26.1-q29	CEBPA	19q11-q13.2	2.689	0.002	0.022	Co-occurrence
TBL1XR1	3q26.1-q29	AKT2	19q11-q13.2	1.971	0.045	0.243	Co-occurrence
TBL1XR1	3q26.1-q29	CCNE1	19q11-q13.2	1.288	0.067	0.306	Co-occurrence
TBL1XR1	3q26.1-q29	CEBPA	19q11-q13.2	2.186	0.013	0.102	Co-occurrence
TCEA1	3q26.1-q29	AKT2	19q11-q13.2	-0.355	0.648	0.656	Mutual exclusivity
TP63	3q26.1-q29	AKT2	19q11-q13.2	1.327	0.159	0.432	Co-occurrence
TP63	3q26.1-q29	CCNE1	19q11-q13.2	1.655	0.022	0.157	Co-occurrence
TP63	3q26.1-q29	CEBPA	19q11-q13.2	2.186	0.013	0.102	Co-occurrence
BCL6	3q26.1-q29	ASXL1	20q11.21-q11.23	-0.322	0.518	0.635	Mutual exclusivity
EIF4A2	3q26.1-q29	ASXL1	20q11.21-q11.23	-0.322	0.518	0.635	Mutual exclusivity
LPP	3q26.1-q29	ASXL1	20q11.21-q11.23	0.523	0.365	0.573	Co-occurrence
MAP3K13	3q26.1-q29	ASXL1	20q11.21-q11.23	-0.515	0.433	0.602	Mutual exclusivity
MECOM	3q26.1-q29	ASXL1	20q11.21-q11.23	0.421	0.385	0.58	Co-occurrence
MLLT11	3q26.1-q29	ASXL1	20q11.21-q11.23	0.295	0.482	0.622	Co-occurrence
PIK3CA	3q26.1-q29	ASXL1	20q11.21-q11.23	-0.606	0.393	0.58	Mutual exclusivity
PRKACA	3q26.1-q29	ASXL1	20q11.21-q11.23	0	0.633	0.655	Mutual exclusivity
SMARCA4	3q26.1-q29	ASXL1	20q11.21-q11.23	1.188	0.149	0.424	Co-occurrence
SOX2	3q26.1-q29	ASXL1	20q11.21-q11.23	-0.42	0.475	0.622	Mutual exclusivity
TBL1XR1	3q26.1-q29	ASXL1	20q11.21-q11.23	0.193	0.525	0.635	Co-occurrence
TP63	3q26.1-q29	ASXL1	20q11.21-q11.23	0.193	0.525	0.635	Co-occurrence
BCL6	3q26.1-q29	SDC4	20q13.12-q13.2	-0.132	0.637	0.655	Mutual exclusivity
EIF4A2	3q26.1-q29	SDC4	20q13.12-q13.2	-0.132	0.637	0.655	Mutual exclusivity
LPP	3q26.1-q29	SDC4	20q13.12-q13.2	-0.401	0.54	0.642	Mutual exclusivity
LYL1	3q26.1-q29	SDC4	20q13.12-q13.2	-0.871	0.49	0.625	Mutual exclusivity
MAP3K13	3q26.1-q29	SDC4	20q13.12-q13.2	-0.314	0.572	0.648	Mutual exclusivity
MECOM	3q26.1-q29	SDC4	20q13.12-q13.2	0.827	0.281	0.529	Co-occurrence
PIK3CA	3q26.1-q29	SDC4	20q13.12-q13.2	-0.401	0.54	0.642	Mutual exclusivity
PRKACA	3q26.1-q29	SDC4	20q13.12-q13.2	0.951	0.352	0.572	Co-occurrence
SMARCA4	3q26.1-q29	SDC4	20q13.12-q13.2	0.17	0.581	0.648	Co-occurrence
SOX2	3q26.1-q29	SDC4	20q13.12-q13.2	-0.225	0.605	0.65	Mutual exclusivity
TBL1XR1	3q26.1-q29	SDC4	20q13.12-q13.2	-0.225	0.605	0.65	Mutual exclusivity
TP63	3q26.1-q29	SDC4	20q13.12-q13.2	-0.225	0.605	0.65	Mutual exclusivity
BCL6	3q26.1-q29	SS18L1	20q13.33-q13.33	0.531	0.424	0.602	Co-occurrence
EIF4A2	3q26.1-q29	SS18L1	20q13.33-q13.33	0.531	0.424	0.602	Co-occurrence
LPP	3q26.1-q29	SS18L1	20q13.33-q13.33	1.533	0.093	0.359	Co-occurrence
LYL1	3q26.1-q29	SS18L1	20q13.33-q13.33	-1.026	0.439	0.602	Mutual exclusivity
MAP3K13	3q26.1-q29	SS18L1	20q13.33-q13.33	0.341	0.493	0.627	Co-occurrence
MECOM	3q26.1-q29	SS18L1	20q13.33-q13.33	0.583	0.364	0.573	Co-occurrence
PIK3CA	3q26.1-q29	SS18L1	20q13.33-q13.33	0.252	0.526	0.635	Co-occurrence
PRKACA	3q26.1-q29	SS18L1	20q13.33-q13.33	0.782	0.397	0.582	Co-occurrence
SDC4	3q26.1-q29	SS18L1	20q13.33-q13.33	1.874	0.104	0.359	Co-occurrence
SMARCA4	3q26.1-q29	SS18L1	20q13.33-q13.33	0	0.633	0.655	Mutual exclusivity
SOX2	3q26.1-q29	SS18L1	20q13.33-q13.33	0.434	0.459	0.617	Co-occurrence
TBL1XR1	3q26.1-q29	SS18L1	20q13.33-q13.33	0.434	0.459	0.617	Co-occurrence
TP63	3q26.1-q29	SS18L1	20q13.33-q13.33	1.115	0.205	0.473	Co-occurrence
BCL6	3q26.1-q29	EIF4A2	3q26.1-q29	>3	<0.001	<0.001	Co-occurrence
BCL6	3q26.1-q29	LPP	3q26.1-q29	>3	<0.001	<0.001	Co-occurrence
BCL6	3q26.1-q29	TP63	3q26.1-q29	>3	<0.001	<0.001	Co-occurrence
EIF4A2	3q26.1-q29	LPP	3q26.1-q29	>3	<0.001	<0.001	Co-occurrence
EIF4A2	3q26.1-q29	TP63	3q26.1-q29	>3	<0.001	<0.001	Co-occurrence
LPP	3q26.1-q29	TP63	3q26.1-q29	>3	<0.001	<0.001	Co-occurrence
MAP3K13	3q26.1-q29	BCL6	3q26.1-q29	>3	<0.001	<0.001	Co-occurrence
MAP3K13	3q26.1-q29	EIF4A2	3q26.1-q29	>3	<0.001	<0.001	Co-occurrence
MAP3K13	3q26.1-q29	LPP	3q26.1-q29	>3	<0.001	<0.001	Co-occurrence
MAP3K13	3q26.1-q29	TP63	3q26.1-q29	>3	<0.001	<0.001	Co-occurrence
MECOM	3q26.1-q29	BCL6	3q26.1-q29	>3	<0.001	<0.001	Co-occurrence
MECOM	3q26.1-q29	EIF4A2	3q26.1-q29	>3	<0.001	<0.001	Co-occurrence
MECOM	3q26.1-q29	LPP	3q26.1-q29	>3	<0.001	<0.001	Co-occurrence
MECOM	3q26.1-q29	MAP3K13	3q26.1-q29	>3	<0.001	<0.001	Co-occurrence
MECOM	3q26.1-q29	PIK3CA	3q26.1-q29	>3	<0.001	<0.001	Co-occurrence
MECOM	3q26.1-q29	SOX2	3q26.1-q29	>3	<0.001	<0.001	Co-occurrence
MECOM	3q26.1-q29	TBL1XR1	3q26.1-q29	>3	<0.001	<0.001	Co-occurrence
MECOM	3q26.1-q29	TP63	3q26.1-q29	>3	<0.001	<0.001	Co-occurrence
MLLT11	3q26.1-q29	BCL6	3q26.1-q29	0.472	0.385	0.58	Co-occurrence
MLLT11	3q26.1-q29	EIF4A2	3q26.1-q29	0.472	0.385	0.58	Co-occurrence
PIK3CA	3q26.1-q29	BCL6	3q26.1-q29	>3	<0.001	<0.001	Co-occurrence
PIK3CA	3q26.1-q29	EIF4A2	3q26.1-q29	>3	<0.001	<0.001	Co-occurrence
PIK3CA	3q26.1-q29	LPP	3q26.1-q29	>3	<0.001	<0.001	Co-occurrence
PIK3CA	3q26.1-q29	MAP3K13	3q26.1-q29	>3	<0.001	<0.001	Co-occurrence
PIK3CA	3q26.1-q29	SOX2	3q26.1-q29	>3	<0.001	<0.001	Co-occurrence
PIK3CA	3q26.1-q29	TBL1XR1	3q26.1-q29	>3	<0.001	<0.001	Co-occurrence
PIK3CA	3q26.1-q29	TP63	3q26.1-q29	>3	<0.001	<0.001	Co-occurrence
SOX2	3q26.1-q29	BCL6	3q26.1-q29	>3	<0.001	<0.001	Co-occurrence
SOX2	3q26.1-q29	EIF4A2	3q26.1-q29	>3	<0.001	<0.001	Co-occurrence
SOX2	3q26.1-q29	LPP	3q26.1-q29	>3	<0.001	<0.001	Co-occurrence
SOX2	3q26.1-q29	MAP3K13	3q26.1-q29	>3	<0.001	<0.001	Co-occurrence
SOX2	3q26.1-q29	TP63	3q26.1-q29	>3	<0.001	<0.001	Co-occurrence
TBL1XR1	3q26.1-q29	BCL6	3q26.1-q29	>3	<0.001	<0.001	Co-occurrence
TBL1XR1	3q26.1-q29	EIF4A2	3q26.1-q29	>3	<0.001	<0.001	Co-occurrence
TBL1XR1	3q26.1-q29	LPP	3q26.1-q29	>3	<0.001	<0.001	Co-occurrence
TBL1XR1	3q26.1-q29	MAP3K13	3q26.1-q29	>3	<0.001	<0.001	Co-occurrence
TBL1XR1	3q26.1-q29	SOX2	3q26.1-q29	>3	<0.001	<0.001	Co-occurrence
TBL1XR1	3q26.1-q29	TP63	3q26.1-q29	>3	<0.001	<0.001	Co-occurrence
BCL6	3q26.1-q29	IL7R	5p15.31-p15.2	-0.303	0.576	0.648	Mutual exclusivity
BCL6	3q26.1-q29	LIFR	5p15.31-p15.2	<-3	0.081	0.351	Mutual exclusivity
EIF4A2	3q26.1-q29	IL7R	5p15.31-p15.2	-0.303	0.576	0.648	Mutual exclusivity
EIF4A2	3q26.1-q29	LIFR	5p15.31-p15.2	<-3	0.081	0.351	Mutual exclusivity
LPP	3q26.1-q29	IL7R	5p15.31-p15.2	-0.572	0.474	0.622	Mutual exclusivity
LPP	3q26.1-q29	LIFR	5p15.31-p15.2	<-3	0.054	0.27	Mutual exclusivity
MAP3K13	3q26.1-q29	IL7R	5p15.31-p15.2	0.341	0.493	0.627	Co-occurrence
MAP3K13	3q26.1-q29	LIFR	5p15.31-p15.2	-1.553	0.27	0.517	Mutual exclusivity
MECOM	3q26.1-q29	IL7R	5p15.31-p15.2	1.138	0.164	0.443	Co-occurrence
MECOM	3q26.1-q29	LIFR	5p15.31-p15.2	0.215	0.532	0.637	Co-occurrence
PIK3CA	3q26.1-q29	IL7R	5p15.31-p15.2	0.252	0.526	0.635	Co-occurrence
PIK3CA	3q26.1-q29	LIFR	5p15.31-p15.2	-0.401	0.54	0.642	Mutual exclusivity
SOX2	3q26.1-q29	IL7R	5p15.31-p15.2	0.434	0.459	0.617	Co-occurrence
SOX2	3q26.1-q29	LIFR	5p15.31-p15.2	-1.466	0.297	0.539	Mutual exclusivity
TBL1XR1	3q26.1-q29	IL7R	5p15.31-p15.2	0.434	0.459	0.617	Co-occurrence
TBL1XR1	3q26.1-q29	LIFR	5p15.31-p15.2	-0.225	0.605	0.65	Mutual exclusivity
TP63	3q26.1-q29	IL7R	5p15.31-p15.2	-0.396	0.541	0.642	Mutual exclusivity
TP63	3q26.1-q29	LIFR	5p15.31-p15.2	<-3	0.071	0.322	Mutual exclusivity
BCL6	3q26.1-q29	HOOK3	8q12.1-q12.1	1.028	0.225	0.482	Co-occurrence
BCL6	3q26.1-q29	IKBKB	8q12.1-q12.1	0.059	0.595	0.65	Co-occurrence
BCL6	3q26.1-q29	KAT6A	8q12.1-q12.1	0.585	0.339	0.564	Co-occurrence
BCL6	3q26.1-q29	NCOA2	8q12.1-q12.1	-0.132	0.637	0.655	Mutual exclusivity
BCL6	3q26.1-q29	TCEA1	8q12.1-q12.1	0.531	0.424	0.602	Co-occurrence
EIF4A2	3q26.1-q29	HOOK3	8q12.1-q12.1	1.028	0.225	0.482	Co-occurrence
EIF4A2	3q26.1-q29	IKBKB	8q12.1-q12.1	0.059	0.595	0.65	Co-occurrence
EIF4A2	3q26.1-q29	KAT6A	8q12.1-q12.1	0.585	0.339	0.564	Co-occurrence
EIF4A2	3q26.1-q29	NCOA2	8q12.1-q12.1	-0.132	0.637	0.655	Mutual exclusivity
EIF4A2	3q26.1-q29	TCEA1	8q12.1-q12.1	0.531	0.424	0.602	Co-occurrence
LPP	3q26.1-q29	HOOK3	8q12.1-q12.1	0.737	0.318	0.548	Co-occurrence
LPP	3q26.1-q29	IKBKB	8q12.1-q12.1	-0.222	0.562	0.648	Mutual exclusivity
LPP	3q26.1-q29	KAT6A	8q12.1-q12.1	0.276	0.473	0.622	Co-occurrence
LPP	3q26.1-q29	NCOA2	8q12.1-q12.1	-0.401	0.54	0.642	Mutual exclusivity
LPP	3q26.1-q29	TCEA1	8q12.1-q12.1	0.252	0.526	0.635	Co-occurrence
MAP3K13	3q26.1-q29	HOOK3	8q12.1-q12.1	1.976	0.03	0.195	Co-occurrence
MAP3K13	3q26.1-q29	IKBKB	8q12.1-q12.1	1.059	0.184	0.455	Co-occurrence
MAP3K13	3q26.1-q29	KAT6A	8q12.1-q12.1	1.277	0.091	0.359	Co-occurrence
MAP3K13	3q26.1-q29	NCOA2	8q12.1-q12.1	-0.314	0.572	0.648	Mutual exclusivity
MAP3K13	3q26.1-q29	TCEA1	8q12.1-q12.1	1.63	0.079	0.346	Co-occurrence
MECOM	3q26.1-q29	HOOK3	8q12.1-q12.1	0.368	0.448	0.61	Co-occurrence
MECOM	3q26.1-q29	IKBKB	8q12.1-q12.1	-0.529	0.393	0.58	Mutual exclusivity
MECOM	3q26.1-q29	KAT6A	8q12.1-q12.1	-0.271	0.473	0.622	Mutual exclusivity
MECOM	3q26.1-q29	NCOA2	8q12.1-q12.1	0.215	0.532	0.637	Co-occurrence
MECOM	3q26.1-q29	TCEA1	8q12.1-q12.1	1.138	0.164	0.443	Co-occurrence
MLLT11	3q26.1-q29	HOOK3	8q12.1-q12.1	0.36	0.484	0.622	Co-occurrence
MLLT11	3q26.1-q29	IKBKB	8q12.1-q12.1	0.059	0.595	0.65	Co-occurrence
PIK3CA	3q26.1-q29	HOOK3	8q12.1-q12.1	1.874	0.038	0.219	Co-occurrence
PIK3CA	3q26.1-q29	IKBKB	8q12.1-q12.1	0.962	0.212	0.482	Co-occurrence
PIK3CA	3q26.1-q29	KAT6A	8q12.1-q12.1	1.169	0.113	0.377	Co-occurrence
PIK3CA	3q26.1-q29	NCOA2	8q12.1-q12.1	-0.401	0.54	0.642	Mutual exclusivity
PIK3CA	3q26.1-q29	TCEA1	8q12.1-q12.1	1.533	0.093	0.359	Co-occurrence
SOX2	3q26.1-q29	HOOK3	8q12.1-q12.1	1.52	0.092	0.359	Co-occurrence
SOX2	3q26.1-q29	IKBKB	8q12.1-q12.1	0.599	0.363	0.573	Co-occurrence
SOX2	3q26.1-q29	KAT6A	8q12.1-q12.1	0.948	0.188	0.456	Co-occurrence
SOX2	3q26.1-q29	NCOA2	8q12.1-q12.1	-0.225	0.605	0.65	Mutual exclusivity
SOX2	3q26.1-q29	TCEA1	8q12.1-q12.1	1.115	0.205	0.473	Co-occurrence
TBL1XR1	3q26.1-q29	HOOK3	8q12.1-q12.1	1.52	0.092	0.359	Co-occurrence
TBL1XR1	3q26.1-q29	IKBKB	8q12.1-q12.1	0.599	0.363	0.573	Co-occurrence
TBL1XR1	3q26.1-q29	KAT6A	8q12.1-q12.1	0.948	0.188	0.456	Co-occurrence
TBL1XR1	3q26.1-q29	NCOA2	8q12.1-q12.1	-1.466	0.297	0.539	Mutual exclusivity
TBL1XR1	3q26.1-q29	TCEA1	8q12.1-q12.1	1.115	0.205	0.473	Co-occurrence
TP63	3q26.1-q29	HOOK3	8q12.1-q12.1	0.927	0.255	0.508	Co-occurrence
TP63	3q26.1-q29	IKBKB	8q12.1-q12.1	-0.038	0.637	0.655	Mutual exclusivity
TP63	3q26.1-q29	KAT6A	8q12.1-q12.1	0.477	0.383	0.58	Co-occurrence
TP63	3q26.1-q29	NCOA2	8q12.1-q12.1	-0.225	0.605	0.65	Mutual exclusivity
TP63	3q26.1-q29	TCEA1	8q12.1-q12.1	0.434	0.459	0.617	Co-occurrence
BCL6	3q26.1-q29	MYC	8q24.13-q24.3	-0.525	0.387	0.58	Mutual exclusivity
BCL6	3q26.1-q29	NDRG1	8q24.13-q24.3	-1.377	0.325	0.554	Mutual exclusivity
EIF4A2	3q26.1-q29	MYC	8q24.13-q24.3	-0.525	0.387	0.58	Mutual exclusivity
EIF4A2	3q26.1-q29	NDRG1	8q24.13-q24.3	-1.377	0.325	0.554	Mutual exclusivity
LPP	3q26.1-q29	MYC	8q24.13-q24.3	-0.341	0.451	0.612	Mutual exclusivity
LPP	3q26.1-q29	NDRG1	8q24.13-q24.3	-1.636	0.246	0.508	Mutual exclusivity
MAP3K13	3q26.1-q29	MYC	8q24.13-q24.3	-0.24	0.503	0.634	Mutual exclusivity
MAP3K13	3q26.1-q29	NDRG1	8q24.13-q24.3	-1.553	0.27	0.517	Mutual exclusivity
MECOM	3q26.1-q29	MYC	8q24.13-q24.3	-0.571	0.292	0.538	Mutual exclusivity
MECOM	3q26.1-q29	NDRG1	8q24.13-q24.3	-1.28	0.22	0.482	Mutual exclusivity
PIK3CA	3q26.1-q29	MYC	8q24.13-q24.3	-0.341	0.451	0.612	Mutual exclusivity
PIK3CA	3q26.1-q29	NDRG1	8q24.13-q24.3	-1.636	0.246	0.508	Mutual exclusivity
SOX2	3q26.1-q29	MYC	8q24.13-q24.3	-0.135	0.557	0.648	Mutual exclusivity
SOX2	3q26.1-q29	NDRG1	8q24.13-q24.3	-1.466	0.297	0.539	Mutual exclusivity
TBL1XR1	3q26.1-q29	MYC	8q24.13-q24.3	-0.135	0.557	0.648	Mutual exclusivity
TBL1XR1	3q26.1-q29	NDRG1	8q24.13-q24.3	-1.466	0.297	0.539	Mutual exclusivity
TP63	3q26.1-q29	MYC	8q24.13-q24.3	-0.629	0.338	0.564	Mutual exclusivity
TP63	3q26.1-q29	NDRG1	8q24.13-q24.3	-1.466	0.297	0.539	Mutual exclusivity
IL7R	5p15.31-p15.2	KAT6B	10q22.2-q22.3	1.688	0.13	0.395	Co-occurrence
LIFR	5p15.31-p15.2	KAT6B	10q22.2-q22.3	1.874	0.104	0.359	Co-occurrence
IL7R	5p15.31-p15.2	CDK12	17q12-q21.1	-0.509	0.603	0.65	Mutual exclusivity
IL7R	5p15.31-p15.2	ERBB2	17q12-q21.1	0.631	0.389	0.58	Co-occurrence
LIFR	5p15.31-p15.2	CDK12	17q12-q21.1	<-3	0.256	0.508	Mutual exclusivity
LIFR	5p15.31-p15.2	ERBB2	17q12-q21.1	-0.036	0.669	0.673	Mutual exclusivity
IL7R	5p15.31-p15.2	BRD4	19p13.2-p13.11	<-3	0.098	0.359	Mutual exclusivity
IL7R	5p15.31-p15.2	CALR	19p13.2-p13.11	0.485	0.482	0.622	Co-occurrence
IL7R	5p15.31-p15.2	DNAJB1	19p13.2-p13.11	<-3	0.171	0.443	Mutual exclusivity
IL7R	5p15.31-p15.2	DNM2	19p13.2-p13.11	-0.106	0.646	0.656	Mutual exclusivity
IL7R	5p15.31-p15.2	JAK3	19p13.2-p13.11	-0.652	0.56	0.648	Mutual exclusivity
IL7R	5p15.31-p15.2	KEAP1	19p13.2-p13.11	0.228	0.561	0.648	Co-occurrence
IL7R	5p15.31-p15.2	LYL1	19p13.2-p13.11	1.09	0.251	0.508	Co-occurrence
IL7R	5p15.31-p15.2	PRKACA	19p13.2-p13.11	-0.509	0.603	0.65	Mutual exclusivity
IL7R	5p15.31-p15.2	SMARCA4	19p13.2-p13.11	0	0.633	0.655	Mutual exclusivity
IL7R	5p15.31-p15.2	TPM4	19p13.2-p13.11	<-3	0.171	0.443	Mutual exclusivity
JAK3	5p15.31-p15.2	CALR	19p13.2-p13.11	1.918	0.064	0.3	Co-occurrence
LIFR	5p15.31-p15.2	BRD4	19p13.2-p13.11	<-3	0.121	0.385	Mutual exclusivity
LIFR	5p15.31-p15.2	CALR	19p13.2-p13.11	0.655	0.433	0.602	Co-occurrence
LIFR	5p15.31-p15.2	DNAJB1	19p13.2-p13.11	<-3	0.2	0.469	Mutual exclusivity
LIFR	5p15.31-p15.2	DNM2	19p13.2-p13.11	0.925	0.299	0.539	Co-occurrence
LIFR	5p15.31-p15.2	JAK3	19p13.2-p13.11	-0.497	0.607	0.65	Mutual exclusivity
LIFR	5p15.31-p15.2	KEAP1	19p13.2-p13.11	1.277	0.208	0.476	Co-occurrence
LIFR	5p15.31-p15.2	LYL1	19p13.2-p13.11	1.277	0.208	0.476	Co-occurrence
LIFR	5p15.31-p15.2	PRKACA	19p13.2-p13.11	-0.355	0.648	0.656	Mutual exclusivity
LIFR	5p15.31-p15.2	SMARCA4	19p13.2-p13.11	1.036	0.268	0.515	Co-occurrence
LIFR	5p15.31-p15.2	TPM4	19p13.2-p13.11	<-3	0.2	0.469	Mutual exclusivity
IL7R	5p15.31-p15.2	AKT2	19q11-q13.2	0.951	0.352	0.572	Co-occurrence
IL7R	5p15.31-p15.2	CCNE1	19q11-q13.2	-0.079	0.622	0.653	Mutual exclusivity
IL7R	5p15.31-p15.2	CEBPA	19q11-q13.2	0.353	0.523	0.635	Co-occurrence
JAK3	5p15.31-p15.2	AKT2	19q11-q13.2	0.797	0.393	0.58	Co-occurrence
JAK3	5p15.31-p15.2	CCNE1	19q11-q13.2	0.968	0.218	0.482	Co-occurrence
JAK3	5p15.31-p15.2	CEBPA	19q11-q13.2	-1.052	0.429	0.602	Mutual exclusivity
LIFR	5p15.31-p15.2	AKT2	19q11-q13.2	1.12	0.311	0.542	Co-occurrence
LIFR	5p15.31-p15.2	CCNE1	19q11-q13.2	-0.721	0.418	0.602	Mutual exclusivity
LIFR	5p15.31-p15.2	CEBPA	19q11-q13.2	-0.754	0.528	0.635	Mutual exclusivity
IL7R	5p15.31-p15.2	ASXL1	20q11.21-q11.23	0.848	0.319	0.548	Co-occurrence
JAK3	5p15.31-p15.2	ASXL1	20q11.21-q11.23	-0.156	0.628	0.655	Mutual exclusivity
LIFR	5p15.31-p15.2	ASXL1	20q11.21-q11.23	0.17	0.581	0.648	Co-occurrence
IL7R	5p15.31-p15.2	SDC4	20q13.12-q13.2	0.951	0.352	0.572	Co-occurrence
LIFR	5p15.31-p15.2	SDC4	20q13.12-q13.2	-0.201	0.689	0.689	Mutual exclusivity
IL7R	5p15.31-p15.2	SS18L1	20q13.33-q13.33	-0.509	0.603	0.65	Mutual exclusivity
LIFR	5p15.31-p15.2	SS18L1	20q13.33-q13.33	-0.355	0.648	0.656	Mutual exclusivity
LIFR	5p15.31-p15.2	IL7R	5p15.31-p15.2	>3	<0.001	<0.001	Co-occurrence
IL7R	5p15.31-p15.2	HOOK3	8q12.1-q12.1	-0.652	0.56	0.648	Mutual exclusivity
IL7R	5p15.31-p15.2	IKBKB	8q12.1-q12.1	0.353	0.523	0.635	Co-occurrence
IL7R	5p15.31-p15.2	KAT6A	8q12.1-q12.1	-0.206	0.611	0.65	Mutual exclusivity
IL7R	5p15.31-p15.2	NCOA2	8q12.1-q12.1	<-3	0.256	0.508	Mutual exclusivity
IL7R	5p15.31-p15.2	TCEA1	8q12.1-q12.1	-0.509	0.603	0.65	Mutual exclusivity
LIFR	5p15.31-p15.2	HOOK3	8q12.1-q12.1	-0.497	0.607	0.65	Mutual exclusivity
LIFR	5p15.31-p15.2	IKBKB	8q12.1-q12.1	0.522	0.472	0.622	Co-occurrence
LIFR	5p15.31-p15.2	KAT6A	8q12.1-q12.1	-0.036	0.669	0.673	Mutual exclusivity
LIFR	5p15.31-p15.2	NCOA2	8q12.1-q12.1	<-3	0.288	0.535	Mutual exclusivity
LIFR	5p15.31-p15.2	TCEA1	8q12.1-q12.1	-0.355	0.648	0.656	Mutual exclusivity
IL7R	5p15.31-p15.2	MYC	8q24.13-q24.3	1.351	0.126	0.393	Co-occurrence
IL7R	5p15.31-p15.2	NDRG1	8q24.13-q24.3	0.951	0.352	0.572	Co-occurrence
LIFR	5p15.31-p15.2	MYC	8q24.13-q24.3	1.593	0.089	0.359	Co-occurrence
LIFR	5p15.31-p15.2	NDRG1	8q24.13-q24.3	1.12	0.311	0.542	Co-occurrence
HOOK3	8p21.1	KAT6B	10q22.2-q22.3	-0.652	0.56	0.648	Mutual exclusivity
IKBKB	8p21.1	KAT6B	10q22.2-q22.3	-0.909	0.477	0.622	Mutual exclusivity
KAT6A	8p21.1	KAT6B	10q22.2-q22.3	-0.206	0.611	0.65	Mutual exclusivity
HOOK3	8p21.1	CDK12	17q12-q21.1	0.628	0.44	0.602	Co-occurrence
HOOK3	8p21.1	ERBB2	17q12-q21.1	1.134	0.197	0.467	Co-occurrence
IKBKB	8p21.1	CDK12	17q12-q21.1	-0.909	0.477	0.622	Mutual exclusivity
IKBKB	8p21.1	ERBB2	17q12-q21.1	0.16	0.556	0.648	Co-occurrence
KAT6A	8p21.1	CDK12	17q12-q21.1	-1.441	0.303	0.539	Mutual exclusivity
KAT6A	8p21.1	ERBB2	17q12-q21.1	-0.44	0.466	0.622	Mutual exclusivity
HOOK3	8p21.1	BRD4	19p13.2-p13.11	1.363	0.145	0.416	Co-occurrence
HOOK3	8p21.1	CALR	19p13.2-p13.11	0.331	0.529	0.635	Co-occurrence
HOOK3	8p21.1	DNAJB1	19p13.2-p13.11	1.918	0.064	0.3	Co-occurrence
HOOK3	8p21.1	DNM2	19p13.2-p13.11	0.567	0.409	0.598	Co-occurrence
HOOK3	8p21.1	JAK3	19p13.2-p13.11	1.35	0.19	0.456	Co-occurrence
HOOK3	8p21.1	KEAP1	19p13.2-p13.11	0.073	0.61	0.65	Co-occurrence
HOOK3	8p21.1	LYL1	19p13.2-p13.11	0.073	0.61	0.65	Co-occurrence
HOOK3	8p21.1	PRKACA	19p13.2-p13.11	0.628	0.44	0.602	Co-occurrence
HOOK3	8p21.1	SMARCA4	19p13.2-p13.11	0.678	0.372	0.579	Co-occurrence
HOOK3	8p21.1	TPM4	19p13.2-p13.11	1.196	0.224	0.482	Co-occurrence
IKBKB	8p21.1	BRD4	19p13.2-p13.11	1.037	0.22	0.482	Co-occurrence
IKBKB	8p21.1	CALR	19p13.2-p13.11	0.898	0.302	0.539	Co-occurrence
IKBKB	8p21.1	DNAJB1	19p13.2-p13.11	1.594	0.104	0.359	Co-occurrence
IKBKB	8p21.1	DNM2	19p13.2-p13.11	0.919	0.254	0.508	Co-occurrence
IKBKB	8p21.1	JAK3	19p13.2-p13.11	1.053	0.26	0.511	Co-occurrence
IKBKB	8p21.1	KEAP1	19p13.2-p13.11	0.621	0.389	0.58	Co-occurrence
IKBKB	8p21.1	LYL1	19p13.2-p13.11	0.621	0.389	0.58	Co-occurrence
IKBKB	8p21.1	PRKACA	19p13.2-p13.11	1.222	0.218	0.482	Co-occurrence
IKBKB	8p21.1	SMARCA4	19p13.2-p13.11	1.037	0.22	0.482	Co-occurrence
IKBKB	8p21.1	TPM4	19p13.2-p13.11	0.898	0.302	0.539	Co-occurrence
KAT6A	8p21.1	BRD4	19p13.2-p13.11	1.914	0.023	0.158	Co-occurrence
KAT6A	8p21.1	CALR	19p13.2-p13.11	0.963	0.242	0.504	Co-occurrence
KAT6A	8p21.1	DNAJB1	19p13.2-p13.11	1.549	0.085	0.355	Co-occurrence
KAT6A	8p21.1	DNM2	19p13.2-p13.11	0.817	0.253	0.508	Co-occurrence
KAT6A	8p21.1	JAK3	19p13.2-p13.11	1.737	0.063	0.3	Co-occurrence
KAT6A	8p21.1	KEAP1	19p13.2-p13.11	0.663	0.338	0.564	Co-occurrence
KAT6A	8p21.1	LYL1	19p13.2-p13.11	0.663	0.338	0.564	Co-occurrence
KAT6A	8p21.1	PRKACA	19p13.2-p13.11	1.322	0.156	0.43	Co-occurrence
KAT6A	8p21.1	SMARCA4	19p13.2-p13.11	0.943	0.214	0.482	Co-occurrence
KAT6A	8p21.1	TPM4	19p13.2-p13.11	1.549	0.085	0.355	Co-occurrence
HOOK3	8p21.1	CCNE1	19q11-q13.2	-2.252	0.097	0.359	Mutual exclusivity
HOOK3	8p21.1	CEBPA	19q11-q13.2	-1.052	0.429	0.602	Mutual exclusivity
IKBKB	8p21.1	AKT2	19q11-q13.2	-0.754	0.528	0.635	Mutual exclusivity
IKBKB	8p21.1	CCNE1	19q11-q13.2	-1.335	0.192	0.46	Mutual exclusivity
IKBKB	8p21.1	CEBPA	19q11-q13.2	-0.079	0.654	0.662	Mutual exclusivity
KAT6A	8p21.1	AKT2	19q11-q13.2	0.819	0.331	0.561	Co-occurrence
KAT6A	8p21.1	CCNE1	19q11-q13.2	-0.585	0.359	0.573	Mutual exclusivity
KAT6A	8p21.1	CEBPA	19q11-q13.2	0.16	0.556	0.648	Co-occurrence
HOOK3	8p21.1	ASXL1	20q11.21-q11.23	-0.156	0.628	0.655	Mutual exclusivity
IKBKB	8p21.1	ASXL1	20q11.21-q11.23	-0.434	0.525	0.635	Mutual exclusivity
KAT6A	8p21.1	ASXL1	20q11.21-q11.23	-1	0.303	0.539	Mutual exclusivity
HOOK3	8p21.1	SDC4	20q13.12-q13.2	-0.497	0.607	0.65	Mutual exclusivity
IKBKB	8p21.1	SDC4	20q13.12-q13.2	-0.754	0.528	0.635	Mutual exclusivity
KAT6A	8p21.1	SDC4	20q13.12-q13.2	-0.036	0.669	0.673	Mutual exclusivity
HOOK3	8p21.1	SS18L1	20q13.33-q13.33	-0.652	0.56	0.648	Mutual exclusivity
IKBKB	8p21.1	SS18L1	20q13.33-q13.33	0.353	0.523	0.635	Co-occurrence
KAT6A	8p21.1	SS18L1	20q13.33-q13.33	0.631	0.389	0.58	Co-occurrence
IKBKB	8p21.1	KAT6A	8p21.1	>3	<0.001	<0.001	Co-occurrence
HOOK3	8p21.1	IKBKB	8q12.1-q12.1	>3	<0.001	<0.001	Co-occurrence
HOOK3	8p21.1	KAT6A	8q12.1-q12.1	>3	<0.001	<0.001	Co-occurrence
HOOK3	8p21.1	NCOA2	8q12.1-q12.1	2.482	0.026	0.176	Co-occurrence
HOOK3	8p21.1	TCEA1	8q12.1-q12.1	>3	<0.001	<0.001	Co-occurrence
IKBKB	8p21.1	NCOA2	8q12.1-q12.1	2.159	0.045	0.243	Co-occurrence
IKBKB	8p21.1	TCEA1	8q12.1-q12.1	>3	<0.001	0.001	Co-occurrence
KAT6A	8p21.1	NCOA2	8q12.1-q12.1	1.532	0.118	0.385	Co-occurrence
KAT6A	8p21.1	TCEA1	8q12.1-q12.1	>3	0.001	0.012	Co-occurrence
HOOK3	8p21.1	MYC	8q24.13-q24.3	1.139	0.17	0.443	Co-occurrence
HOOK3	8p21.1	NDRG1	8q24.13-q24.3	1.706	0.127	0.393	Co-occurrence
IKBKB	8p21.1	MYC	8q24.13-q24.3	1.283	0.112	0.377	Co-occurrence
IKBKB	8p21.1	NDRG1	8q24.13-q24.3	2.159	0.045	0.243	Co-occurrence
KAT6A	8p21.1	MYC	8q24.13-q24.3	1.374	0.064	0.3	Co-occurrence
KAT6A	8p21.1	NDRG1	8q24.13-q24.3	2.188	0.029	0.19	Co-occurrence
NCOA2	8q12.1-q12.1	KAT6B	10q22.2-q22.3	0.951	0.352	0.572	Co-occurrence
TCEA1	8q12.1-q12.1	KAT6B	10q22.2-q22.3	-0.509	0.603	0.65	Mutual exclusivity
NCOA2	8q12.1-q12.1	CDK12	17q12-q21.1	1.874	0.104	0.359	Co-occurrence
NCOA2	8q12.1-q12.1	ERBB2	17q12-q21.1	1.532	0.118	0.385	Co-occurrence
TCEA1	8q12.1-q12.1	CDK12	17q12-q21.1	2.459	0.027	0.18	Co-occurrence
TCEA1	8q12.1-q12.1	ERBB2	17q12-q21.1	1.948	0.044	0.243	Co-occurrence
NCOA2	8q12.1-q12.1	BRD4	19p13.2-p13.11	1.76	0.084	0.355	Co-occurrence
NCOA2	8q12.1-q12.1	CALR	19p13.2-p13.11	-0.63	0.567	0.648	Mutual exclusivity
NCOA2	8q12.1-q12.1	DNAJB1	19p13.2-p13.11	0.655	0.433	0.602	Co-occurrence
NCOA2	8q12.1-q12.1	DNM2	19p13.2-p13.11	0.065	0.614	0.65	Co-occurrence
NCOA2	8q12.1-q12.1	JAK3	19p13.2-p13.11	2.482	0.026	0.176	Co-occurrence
NCOA2	8q12.1-q12.1	KEAP1	19p13.2-p13.11	-0.871	0.49	0.625	Mutual exclusivity
NCOA2	8q12.1-q12.1	LYL1	19p13.2-p13.11	-0.871	0.49	0.625	Mutual exclusivity
NCOA2	8q12.1-q12.1	PRKACA	19p13.2-p13.11	<-3	0.256	0.508	Mutual exclusivity
NCOA2	8q12.1-q12.1	SMARCA4	19p13.2-p13.11	0.17	0.581	0.648	Co-occurrence
NCOA2	8q12.1-q12.1	TPM4	19p13.2-p13.11	0.655	0.433	0.602	Co-occurrence
TCEA1	8q12.1-q12.1	BRD4	19p13.2-p13.11	2.189	0.028	0.181	Co-occurrence
TCEA1	8q12.1-q12.1	CALR	19p13.2-p13.11	1.365	0.187	0.456	Co-occurrence
TCEA1	8q12.1-q12.1	DNAJB1	19p13.2-p13.11	2.104	0.048	0.257	Co-occurrence
TCEA1	8q12.1-q12.1	DNM2	19p13.2-p13.11	0.737	0.354	0.572	Co-occurrence
TCEA1	8q12.1-q12.1	JAK3	19p13.2-p13.11	1.519	0.157	0.43	Co-occurrence
TCEA1	8q12.1-q12.1	KEAP1	19p13.2-p13.11	-1.026	0.439	0.602	Mutual exclusivity
TCEA1	8q12.1-q12.1	LYL1	19p13.2-p13.11	1.09	0.251	0.508	Co-occurrence
TCEA1	8q12.1-q12.1	PRKACA	19p13.2-p13.11	0.782	0.397	0.582	Co-occurrence
TCEA1	8q12.1-q12.1	SMARCA4	19p13.2-p13.11	1.55	0.113	0.377	Co-occurrence
TCEA1	8q12.1-q12.1	TPM4	19p13.2-p13.11	1.365	0.187	0.456	Co-occurrence
NCOA2	8q12.1-q12.1	AKT2	19q11-q13.2	-0.201	0.689	0.689	Mutual exclusivity
NCOA2	8q12.1-q12.1	CCNE1	19q11-q13.2	0.798	0.307	0.541	Co-occurrence
NCOA2	8q12.1-q12.1	CEBPA	19q11-q13.2	-0.754	0.528	0.635	Mutual exclusivity
TCEA1	8q12.1-q12.1	CCNE1	19q11-q13.2	0.585	0.378	0.58	Co-occurrence
TCEA1	8q12.1-q12.1	CEBPA	19q11-q13.2	0.353	0.523	0.635	Co-occurrence
NCOA2	8q12.1-q12.1	ASXL1	20q11.21-q11.23	1.76	0.084	0.355	Co-occurrence
TCEA1	8q12.1-q12.1	ASXL1	20q11.21-q11.23	1.55	0.113	0.377	Co-occurrence
NCOA2	8q12.1-q12.1	SDC4	20q13.12-q13.2	-0.201	0.689	0.689	Mutual exclusivity
TCEA1	8q12.1-q12.1	SDC4	20q13.12-q13.2	-0.355	0.648	0.656	Mutual exclusivity
NCOA2	8q12.1-q12.1	SS18L1	20q13.33-q13.33	-0.355	0.648	0.656	Mutual exclusivity
TCEA1	8q12.1-q12.1	SS18L1	20q13.33-q13.33	0.782	0.397	0.582	Co-occurrence
NCOA2	8q12.1-q12.1	TCEA1	8q12.1-q12.1	>3	<0.001	<0.001	Co-occurrence
NCOA2	8q12.1-q12.1	MYC	8q24.13-q24.3	2.208	0.022	0.157	Co-occurrence
NCOA2	8q12.1-q12.1	NDRG1	8q24.13-q24.3	>3	0.001	0.014	Co-occurrence
TCEA1	8q12.1-q12.1	MYC	8q24.13-q24.3	1.926	0.036	0.217	Co-occurrence
TCEA1	8q12.1-q12.1	NDRG1	8q24.13-q24.3	>3	0.002	0.022	Co-occurrence
MYC	8q24.13-q24.3	KAT6B	10q22.2-q22.3	0.081	0.59	0.65	Co-occurrence
NDRG1	8q24.13-q24.3	KAT6B	10q22.2-q22.3	-0.355	0.648	0.656	Mutual exclusivity
MYC	8q24.13-q24.3	CDK12	17q12-q21.1	0.75	0.317	0.548	Co-occurrence
MYC	8q24.13-q24.3	ERBB2	17q12-q21.1	0.543	0.336	0.564	Co-occurrence
NDRG1	8q24.13-q24.3	CDK12	17q12-q21.1	0.951	0.352	0.572	Co-occurrence
NDRG1	8q24.13-q24.3	ERBB2	17q12-q21.1	0.819	0.331	0.561	Co-occurrence
MYC	8q24.13-q24.3	BRD4	19p13.2-p13.11	-0.179	0.554	0.648	Mutual exclusivity
MYC	8q24.13-q24.3	CALR	19p13.2-p13.11	0.95	0.219	0.482	Co-occurrence
MYC	8q24.13-q24.3	DNAJB1	19p13.2-p13.11	-0.248	0.552	0.648	Mutual exclusivity
MYC	8q24.13-q24.3	DNM2	19p13.2-p13.11	0.21	0.504	0.634	Co-occurrence
MYC	8q24.13-q24.3	JAK3	19p13.2-p13.11	-0.091	0.617	0.65	Mutual exclusivity
MYC	8q24.13-q24.3	KEAP1	19p13.2-p13.11	0.085	0.573	0.648	Co-occurrence
MYC	8q24.13-q24.3	LYL1	19p13.2-p13.11	0.62	0.329	0.561	Co-occurrence
MYC	8q24.13-q24.3	PRKACA	19p13.2-p13.11	0.081	0.59	0.65	Co-occurrence
MYC	8q24.13-q24.3	SMARCA4	19p13.2-p13.11	0.338	0.446	0.61	Co-occurrence
MYC	8q24.13-q24.3	TPM4	19p13.2-p13.11	-2.236	0.099	0.359	Mutual exclusivity
NDRG1	8q24.13-q24.3	BRD4	19p13.2-p13.11	0.17	0.581	0.648	Co-occurrence
NDRG1	8q24.13-q24.3	CALR	19p13.2-p13.11	0.655	0.433	0.602	Co-occurrence
NDRG1	8q24.13-q24.3	DNAJB1	19p13.2-p13.11	-0.63	0.567	0.648	Mutual exclusivity
NDRG1	8q24.13-q24.3	DNM2	19p13.2-p13.11	0.065	0.614	0.65	Co-occurrence
NDRG1	8q24.13-q24.3	JAK3	19p13.2-p13.11	-0.497	0.607	0.65	Mutual exclusivity
NDRG1	8q24.13-q24.3	KEAP1	19p13.2-p13.11	-0.871	0.49	0.625	Mutual exclusivity
NDRG1	8q24.13-q24.3	LYL1	19p13.2-p13.11	0.398	0.51	0.635	Co-occurrence
NDRG1	8q24.13-q24.3	PRKACA	19p13.2-p13.11	<-3	0.256	0.508	Mutual exclusivity
NDRG1	8q24.13-q24.3	SMARCA4	19p13.2-p13.11	0.17	0.581	0.648	Co-occurrence
NDRG1	8q24.13-q24.3	TPM4	19p13.2-p13.11	<-3	0.2	0.469	Mutual exclusivity
MYC	8q24.13-q24.3	AKT2	19q11-q13.2	0.962	0.253	0.508	Co-occurrence
MYC	8q24.13-q24.3	CCNE1	19q11-q13.2	-0.29	0.46	0.617	Mutual exclusivity
MYC	8q24.13-q24.3	CEBPA	19q11-q13.2	1.283	0.112	0.377	Co-occurrence
NDRG1	8q24.13-q24.3	AKT2	19q11-q13.2	-0.201	0.689	0.689	Mutual exclusivity
NDRG1	8q24.13-q24.3	CCNE1	19q11-q13.2	-0.721	0.418	0.602	Mutual exclusivity
NDRG1	8q24.13-q24.3	CEBPA	19q11-q13.2	0.522	0.472	0.622	Co-occurrence
MYC	8q24.13-q24.3	ASXL1	20q11.21-q11.23	0.807	0.235	0.496	Co-occurrence
NDRG1	8q24.13-q24.3	ASXL1	20q11.21-q11.23	2.429	0.018	0.136	Co-occurrence
MYC	8q24.13-q24.3	SDC4	20q13.12-q13.2	-0.565	0.478	0.622	Mutual exclusivity
NDRG1	8q24.13-q24.3	SDC4	20q13.12-q13.2	<-3	0.288	0.535	Mutual exclusivity
MYC	8q24.13-q24.3	SS18L1	20q13.33-q13.33	0.081	0.59	0.65	Co-occurrence
NDRG1	8q24.13-q24.3	SS18L1	20q13.33-q13.33	-0.355	0.648	0.656	Mutual exclusivity
MYC	8q24.13-q24.3	NDRG1	8q24.13-q24.3	>3	<0.001	<0.001	Co-occurrence
KAT6B	10q22.2-q22.3	CDK12	17q12-q21.1	-0.509	0.603	0.65	Mutual exclusivity
KAT6B	10q22.2-q22.3	ERBB2	17q12-q21.1	-1.441	0.303	0.539	Mutual exclusivity
KAT6B	10q22.2-q22.3	BRD4	19p13.2-p13.11	0.848	0.319	0.548	Co-occurrence
KAT6B	10q22.2-q22.3	CALR	19p13.2-p13.11	<-3	0.171	0.443	Mutual exclusivity
KAT6B	10q22.2-q22.3	DNAJB1	19p13.2-p13.11	<-3	0.171	0.443	Mutual exclusivity
KAT6B	10q22.2-q22.3	DNM2	19p13.2-p13.11	0.737	0.354	0.572	Co-occurrence
KAT6B	10q22.2-q22.3	JAK3	19p13.2-p13.11	1.519	0.157	0.43	Co-occurrence
KAT6B	10q22.2-q22.3	KEAP1	19p13.2-p13.11	1.807	0.077	0.341	Co-occurrence
KAT6B	10q22.2-q22.3	LYL1	19p13.2-p13.11	<-3	0.13	0.395	Mutual exclusivity
KAT6B	10q22.2-q22.3	PRKACA	19p13.2-p13.11	<-3	0.224	0.482	Mutual exclusivity
KAT6B	10q22.2-q22.3	SMARCA4	19p13.2-p13.11	0	0.633	0.655	Mutual exclusivity
KAT6B	10q22.2-q22.3	TPM4	19p13.2-p13.11	1.365	0.187	0.456	Co-occurrence
KAT6B	10q22.2-q22.3	AKT2	19q11-q13.2	0.951	0.352	0.572	Co-occurrence
KAT6B	10q22.2-q22.3	CCNE1	19q11-q13.2	-0.893	0.35	0.572	Mutual exclusivity
KAT6B	10q22.2-q22.3	CEBPA	19q11-q13.2	-0.909	0.477	0.622	Mutual exclusivity
KAT6B	10q22.2-q22.3	ASXL1	20q11.21-q11.23	0	0.633	0.655	Mutual exclusivity
KAT6B	10q22.2-q22.3	SDC4	20q13.12-q13.2	1.874	0.104	0.359	Co-occurrence
KAT6B	10q22.2-q22.3	SS18L1	20q13.33-q13.33	-0.509	0.603	0.65	Mutual exclusivity
ERBB2	17q12-q21.1	CDK12	17q12-q21.1	>3	<0.001	<0.001	Co-occurrence
CDK12	17q12-q21.1	BRD4	19p13.2-p13.11	-1.243	0.367	0.575	Mutual exclusivity
CDK12	17q12-q21.1	CALR	19p13.2-p13.11	-0.785	0.518	0.635	Mutual exclusivity
CDK12	17q12-q21.1	DNAJB1	19p13.2-p13.11	-0.785	0.518	0.635	Mutual exclusivity
CDK12	17q12-q21.1	DNM2	19p13.2-p13.11	-0.106	0.646	0.656	Mutual exclusivity
CDK12	17q12-q21.1	JAK3	19p13.2-p13.11	0.628	0.44	0.602	Co-occurrence
CDK12	17q12-q21.1	KEAP1	19p13.2-p13.11	-1.026	0.439	0.602	Mutual exclusivity
CDK12	17q12-q21.1	LYL1	19p13.2-p13.11	-1.026	0.439	0.602	Mutual exclusivity
CDK12	17q12-q21.1	PRKACA	19p13.2-p13.11	-0.509	0.603	0.65	Mutual exclusivity
CDK12	17q12-q21.1	SMARCA4	19p13.2-p13.11	0.848	0.319	0.548	Co-occurrence
CDK12	17q12-q21.1	TPM4	19p13.2-p13.11	-0.785	0.518	0.635	Mutual exclusivity
ERBB2	17q12-q21.1	BRD4	19p13.2-p13.11	-0.22	0.563	0.648	Mutual exclusivity
ERBB2	17q12-q21.1	CALR	19p13.2-p13.11	-0.507	0.497	0.631	Mutual exclusivity
ERBB2	17q12-q21.1	DNAJB1	19p13.2-p13.11	-0.507	0.497	0.631	Mutual exclusivity
ERBB2	17q12-q21.1	DNM2	19p13.2-p13.11	1.306	0.102	0.359	Co-occurrence
ERBB2	17q12-q21.1	JAK3	19p13.2-p13.11	0.461	0.447	0.61	Co-occurrence
ERBB2	17q12-q21.1	KEAP1	19p13.2-p13.11	1.222	0.142	0.416	Co-occurrence
ERBB2	17q12-q21.1	LYL1	19p13.2-p13.11	0.026	0.607	0.65	Co-occurrence
ERBB2	17q12-q21.1	PRKACA	19p13.2-p13.11	-0.206	0.611	0.65	Mutual exclusivity
ERBB2	17q12-q21.1	SMARCA4	19p13.2-p13.11	1.914	0.023	0.158	Co-occurrence
ERBB2	17q12-q21.1	TPM4	19p13.2-p13.11	-1.72	0.218	0.482	Mutual exclusivity
CDK12	17q12-q21.1	AKT2	19q11-q13.2	-0.355	0.648	0.656	Mutual exclusivity
CDK12	17q12-q21.1	CCNE1	19q11-q13.2	0.585	0.378	0.58	Co-occurrence
CDK12	17q12-q21.1	CEBPA	19q11-q13.2	0.353	0.523	0.635	Co-occurrence
ERBB2	17q12-q21.1	AKT2	19q11-q13.2	-1.284	0.354	0.572	Mutual exclusivity
ERBB2	17q12-q21.1	CCNE1	19q11-q13.2	-0.086	0.581	0.648	Mutual exclusivity
ERBB2	17q12-q21.1	CEBPA	19q11-q13.2	0.16	0.556	0.648	Co-occurrence
HOOK3	17q12-q21.1	AKT2	19q11-q13.2	-0.497	0.607	0.65	Mutual exclusivity
CDK12	17q12-q21.1	ASXL1	20q11.21-q11.23	0	0.633	0.655	Mutual exclusivity
ERBB2	17q12-q21.1	ASXL1	20q11.21-q11.23	0.943	0.214	0.482	Co-occurrence
CDK12	17q12-q21.1	SDC4	20q13.12-q13.2	1.874	0.104	0.359	Co-occurrence
ERBB2	17q12-q21.1	SDC4	20q13.12-q13.2	1.532	0.118	0.385	Co-occurrence
CDK12	17q12-q21.1	SS18L1	20q13.33-q13.33	1.688	0.13	0.395	Co-occurrence
ERBB2	17q12-q21.1	SS18L1	20q13.33-q13.33	0.631	0.389	0.58	Co-occurrence
LYL1	19p13.2-p13.1	KEAP1	19p13.2-p13.11	>3	<0.001	0.003	Co-occurrence
BRD4	19p13.2-p13.11	CALR	19p13.2-p13.11	>3	<0.001	<0.001	Co-occurrence
BRD4	19p13.2-p13.11	DNAJB1	19p13.2-p13.11	>3	<0.001	<0.001	Co-occurrence
BRD4	19p13.2-p13.11	DNM2	19p13.2-p13.11	3	<0.001	0.005	Co-occurrence
BRD4	19p13.2-p13.11	KEAP1	19p13.2-p13.11	>3	<0.001	0.008	Co-occurrence
BRD4	19p13.2-p13.11	LYL1	19p13.2-p13.11	>3	<0.001	<0.001	Co-occurrence
BRD4	19p13.2-p13.11	PRKACA	19p13.2-p13.11	>3	<0.001	<0.001	Co-occurrence
BRD4	19p13.2-p13.11	SMARCA4	19p13.2-p13.11	>3	<0.001	<0.001	Co-occurrence
BRD4	19p13.2-p13.11	TPM4	19p13.2-p13.11	>3	<0.001	<0.001	Co-occurrence
CALR	19p13.2-p13.11	DNM2	19p13.2-p13.11	>3	<0.001	<0.001	Co-occurrence
CALR	19p13.2-p13.11	KEAP1	19p13.2-p13.11	>3	<0.001	0.008	Co-occurrence
CALR	19p13.2-p13.11	SMARCA4	19p13.2-p13.11	>3	<0.001	<0.001	Co-occurrence
DNAJB1	19p13.2-p13.11	CALR	19p13.2-p13.11	>3	<0.001	<0.001	Co-occurrence
DNAJB1	19p13.2-p13.11	DNM2	19p13.2-p13.11	2.773	0.003	0.027	Co-occurrence
DNAJB1	19p13.2-p13.11	KEAP1	19p13.2-p13.11	2.068	0.033	0.205	Co-occurrence
DNAJB1	19p13.2-p13.11	LYL1	19p13.2-p13.11	>3	<0.001	<0.001	Co-occurrence
DNAJB1	19p13.2-p13.11	PRKACA	19p13.2-p13.11	>3	<0.001	<0.001	Co-occurrence
DNAJB1	19p13.2-p13.11	SMARCA4	19p13.2-p13.11	>3	<0.001	0.002	Co-occurrence
DNAJB1	19p13.2-p13.11	TPM4	19p13.2-p13.11	>3	<0.001	<0.001	Co-occurrence
DNM2	19p13.2-p13.11	KEAP1	19p13.2-p13.11	>3	<0.001	<0.001	Co-occurrence
DNM2	19p13.2-p13.11	SMARCA4	19p13.2-p13.11	>3	<0.001	<0.001	Co-occurrence
JAK3	19p13.2-p13.11	BRD4	19p13.2-p13.11	>3	<0.001	<0.001	Co-occurrence
JAK3	19p13.2-p13.11	DNAJB1	19p13.2-p13.11	>3	0.002	0.017	Co-occurrence
JAK3	19p13.2-p13.11	DNM2	19p13.2-p13.11	0.567	0.409	0.598	Co-occurrence
JAK3	19p13.2-p13.11	KEAP1	19p13.2-p13.11	1.62	0.1	0.359	Co-occurrence
JAK3	19p13.2-p13.11	LYL1	19p13.2-p13.11	1.62	0.1	0.359	Co-occurrence
JAK3	19p13.2-p13.11	PRKACA	19p13.2-p13.11	2.974	0.006	0.051	Co-occurrence
JAK3	19p13.2-p13.11	SMARCA4	19p13.2-p13.11	1.363	0.145	0.416	Co-occurrence
JAK3	19p13.2-p13.11	TPM4	19p13.2-p13.11	>3	<0.001	<0.001	Co-occurrence
KEAP1	19p13.2-p13.11	SMARCA4	19p13.2-p13.11	>3	<0.001	<0.001	Co-occurrence
LYL1	19p13.2-p13.11	CALR	19p13.2-p13.11	>3	<0.001	<0.001	Co-occurrence
LYL1	19p13.2-p13.11	DNM2	19p13.2-p13.11	>3	<0.001	<0.001	Co-occurrence
LYL1	19p13.2-p13.11	SMARCA4	19p13.2-p13.11	>3	<0.001	<0.001	Co-occurrence
PRKACA	19p13.2-p13.11	CALR	19p13.2-p13.11	>3	<0.001	<0.001	Co-occurrence
PRKACA	19p13.2-p13.11	DNM2	19p13.2-p13.11	>3	<0.001	0.009	Co-occurrence
PRKACA	19p13.2-p13.11	KEAP1	19p13.2-p13.11	>3	0.002	0.022	Co-occurrence
PRKACA	19p13.2-p13.11	LYL1	19p13.2-p13.11	>3	<0.001	<0.001	Co-occurrence
PRKACA	19p13.2-p13.11	SMARCA4	19p13.2-p13.11	>3	<0.001	<0.001	Co-occurrence
PRKACA	19p13.2-p13.11	TPM4	19p13.2-p13.11	>3	<0.001	<0.001	Co-occurrence
BRD4	19p13.2-p13.11	AKT2	19q11-q13.2	1.036	0.268	0.515	Co-occurrence
BRD4	19p13.2-p13.11	CCNE1	19q11-q13.2	1.485	0.052	0.27	Co-occurrence
BRD4	19p13.2-p13.11	CEBPA	19q11-q13.2	1.037	0.22	0.482	Co-occurrence
CALR	19p13.2-p13.11	AKT2	19q11-q13.2	0.655	0.433	0.602	Co-occurrence
CALR	19p13.2-p13.11	CCNE1	19q11-q13.2	0.778	0.276	0.523	Co-occurrence
CALR	19p13.2-p13.11	CEBPA	19q11-q13.2	0.898	0.302	0.539	Co-occurrence
DNAJB1	19p13.2-p13.11	AKT2	19q11-q13.2	1.552	0.152	0.429	Co-occurrence
DNAJB1	19p13.2-p13.11	CCNE1	19q11-q13.2	1.798	0.035	0.214	Co-occurrence
DNAJB1	19p13.2-p13.11	CEBPA	19q11-q13.2	1.594	0.104	0.359	Co-occurrence
DNM2	19p13.2-p13.11	AKT2	19q11-q13.2	-1.188	0.386	0.58	Mutual exclusivity
DNM2	19p13.2-p13.11	CCNE1	19q11-q13.2	-0.469	0.415	0.602	Mutual exclusivity
DNM2	19p13.2-p13.11	CEBPA	19q11-q13.2	0.267	0.516	0.635	Co-occurrence
KEAP1	19p13.2-p13.11	AKT2	19q11-q13.2	-0.871	0.49	0.625	Mutual exclusivity
KEAP1	19p13.2-p13.11	CCNE1	19q11-q13.2	-1.463	0.154	0.43	Mutual exclusivity
KEAP1	19p13.2-p13.11	CEBPA	19q11-q13.2	-1.429	0.305	0.539	Mutual exclusivity
BRD4	19p13.2-p13.11	ASXL1	20q11.21-q11.23	1.188	0.149	0.424	Co-occurrence
CALR	19p13.2-p13.11	ASXL1	20q11.21-q11.23	1.791	0.056	0.273	Co-occurrence
DNAJB1	19p13.2-p13.11	ASXL1	20q11.21-q11.23	1.193	0.181	0.447	Co-occurrence
DNM2	19p13.2-p13.11	ASXL1	20q11.21-q11.23	1.566	0.063	0.3	Co-occurrence
KEAP1	19p13.2-p13.11	ASXL1	20q11.21-q11.23	0.893	0.261	0.511	Co-occurrence
BRD4	19p13.2-p13.11	SDC4	20q13.12-q13.2	1.036	0.268	0.515	Co-occurrence
CALR	19p13.2-p13.11	SDC4	20q13.12-q13.2	-0.63	0.567	0.648	Mutual exclusivity
DNAJB1	19p13.2-p13.11	SDC4	20q13.12-q13.2	0.655	0.433	0.602	Co-occurrence
DNM2	19p13.2-p13.11	SDC4	20q13.12-q13.2	0.925	0.299	0.539	Co-occurrence
JAK3	19p13.2-p13.11	SDC4	20q13.12-q13.2	2.482	0.026	0.176	Co-occurrence
KEAP1	19p13.2-p13.11	SDC4	20q13.12-q13.2	1.277	0.208	0.476	Co-occurrence
BRD4	19p13.2-p13.11	SS18L1	20q13.33-q13.33	0.848	0.319	0.548	Co-occurrence
CALR	19p13.2-p13.11	SS18L1	20q13.33-q13.33	-0.785	0.518	0.635	Mutual exclusivity
DNAJB1	19p13.2-p13.11	SS18L1	20q13.33-q13.33	2.104	0.048	0.257	Co-occurrence
DNM2	19p13.2-p13.11	SS18L1	20q13.33-q13.33	-0.106	0.646	0.656	Mutual exclusivity
JAK3	19p13.2-p13.11	SS18L1	20q13.33-q13.33	1.519	0.157	0.43	Co-occurrence
KEAP1	19p13.2-p13.11	SS18L1	20q13.33-q13.33	0.228	0.561	0.648	Co-occurrence
TPM4	19p13.2-p13.11	CALR	19p13.2-p13.11	>3	<0.001	0.003	Co-occurrence
TPM4	19q11-q13.2	DNM2	19p13.2-p13.11	1.667	0.069	0.317	Co-occurrence
TPM4	19q11-q13.2	KEAP1	19p13.2-p13.11	2.068	0.033	0.205	Co-occurrence
TPM4	19p13.2-p13.11	LYL1	19p13.2-p13.11	>3	<0.001	0.008	Co-occurrence
TPM4	19q11-q13.2	SMARCA4	19p13.2-p13.11	2.358	0.012	0.101	Co-occurrence
CCNE1	19q11-q13.2	AKT2	19q11-q13.2	>3	<0.001	<0.001	Co-occurrence
CEBPA	19q11-q13.2	AKT2	19q11-q13.2	2.159	0.045	0.243	Co-occurrence
CEBPA	19q11-q13.2	CCNE1	19q11-q13.2	>3	<0.001	<0.001	Co-occurrence
TPM4	19q11-q13.2	AKT2	19q11-q13.2	0.655	0.433	0.602	Co-occurrence
TPM4	19q11-q13.2	CCNE1	19q11-q13.2	1.295	0.113	0.377	Co-occurrence
TPM4	19q11-q13.2	CEBPA	19q11-q13.2	0.898	0.302	0.539	Co-occurrence
CCNE1	19q11-q13.2	ASXL1	20q11.21-q11.23	0.164	0.526	0.635	Co-occurrence
CEBPA	19q11-q13.2	ASXL1	20q11.21-q11.23	-0.434	0.525	0.635	Mutual exclusivity
TPM4	19q11-q13.2	ASXL1	20q11.21-q11.23	-0.3	0.576	0.648	Mutual exclusivity
CCNE1	19q11-q13.2	SDC4	20q13.12-q13.2	1.423	0.118	0.385	Co-occurrence
CEBPA	19q11-q13.2	SDC4	20q13.12-q13.2	0.522	0.472	0.622	Co-occurrence
TPM4	19q11-q13.2	SDC4	20q13.12-q13.2	1.552	0.152	0.429	Co-occurrence
CCNE1	19q11-q13.2	SS18L1	20q13.33-q13.33	1.75	0.053	0.27	Co-occurrence
CEBPA	19q11-q13.2	SS18L1	20q13.33-q13.33	0.353	0.523	0.635	Co-occurrence
